Motor cortex signals corresponding to the two arms are shared across hemispheres, mixed among neurons, yet partitioned within the population response

K. Cora Ames<sup>1,2,3,4\*</sup> and Mark M. Churchland<sup>1,2,4,5</sup>

1. Department of Neuroscience, Columbia University Medical Center, New York, NY 10032, USA
2. Zuckerman Institute, Columbia University, New York, NY 10027, USA
3. Center for Theoretical Neuroscience, Columbia University Medical Center, New York, NY 10032, USA
4. Grossman Center for the Statistics of Mind, Columbia University, New York, NY 10027, USA
5. Kavli Institute for Brain Science, Columbia University Medical Center, New York, NY 10032, USA

\* Corresponding author: [kca2120@columbia.edu](mailto:kca2120@columbia.edu)

1 **Abstract**

2 Primary motor cortex (M1) has lateralized outputs, yet M1 neurons can be active during  
3 movements of either arm. What is the nature and role of activity in the two hemispheres? When  
4 one arm moves, are the contralateral and ipsilateral cortices performing similar or different  
5 computations? When both hemispheres are active, how does the brain avoid moving the “wrong”  
6 arm? We recorded muscle and neural activity bilaterally while two male monkeys (*Macaca*  
7 *mulatta*) performed a cycling task with one or the other arm. Neurons in both hemispheres were  
8 active during movements of either arm. Yet response patterns were arm-dependent, raising two  
9 possibilities. First, the nature of neural signals may differ (e.g., be high versus low-level)  
10 depending on whether the ipsilateral or contralateral arm is used. Second, the same population-  
11 level signals may be present regardless of the arm being used, but be reflected differently at the  
12 individual-neuron level. The data supported this second hypothesis. Muscle activity could be  
13 predicted by neural activity in either hemisphere. More broadly, we failed to find signals unique  
14 to the hemisphere contralateral to the moving arm. Yet if the same signals are shared across  
15 hemispheres, how do they avoid impacting the wrong arm? We found that activity related to the  
16 two arms occupied distinct, orthogonal subspaces of population activity. As a consequence, a  
17 linear decode of contralateral muscle activity naturally ignored signals related to the ipsilateral  
18 arm. Thus, information regarding the two arms is shared across hemispheres and neurons, but  
19 partitioned at the population level.

## 20 **Introduction**

21 The outputs of motor cortex (M1) are lateralized: most spinal projections influence the  
22 contralateral musculature. M1 lesions thus produce contralateral motor deficits (Liu and Rouiller,  
23 1999; Murata et al., 2008; Passingham et al., 1983; Vilensky and Gilman, 2002). Similarly,  
24 electrical microstimulation activates contralateral musculature (Kwan et al., 1978; Sessle and  
25 Wiesendanger, 1982). The degree to which computations within M1 are lateralized versus shared  
26 across hemispheres remains less clear. The corpus callosum interconnects M1 across  
27 hemispheres, yielding the potential for extensive cooperation (Gould et al., 1986; Jenny, 1979;  
28 Jones and Wise, 1977). Callosally mediated interactions are readily revealed by paired-pulse  
29 TMS protocols and can involve net facilitation or suppression (Ferber et al., 1992; Hanajima et  
30 al., 2001; Meyer et al., 1995). An obvious role for inter-hemispheric cooperation is coordination  
31 of bimanual movement (Donchin et al., 1998; Kermadi et al., 1998). Yet there is evidence that  
32 unimanual movements also involve sharing of information across hemispheres.

33 Most physiological studies of unimanual movements have focused on activity contralateral to the  
34 moving limb, on the grounds that contralateral activity is most functionally relevant and likely to  
35 be most prevalent. Yet studies investigating ipsilateral activity have found that it can be robust.  
36 Ipsilateral activity is minimal for tasks performed primarily with the digits (Matsunami and  
37 Hamada, 1981; Tanji et al., 1988; Aizawa et al., 1990) but prevalent during movements of the  
38 upper arm, such as reaching to remove food from a drawer (Kermadi et al., 1998; Kazennikov et  
39 al., 1999), or performing center-out reaching movements (Donchin et al., 2002; Steinberg et al.,  
40 2002; Cisek et al., 2003; Ganguly et al., 2009).

41 While the presence of ipsilateral activity is established, the nature of that activity is less clear.  
42 Few studies have directly compared neural response patterns when the same movement is  
43 performed by one arm versus the other. In premotor areas, delay-period responses can encode  
44 information about an upcoming reach (Cisek et al., 2003) or grasp (Michaels and Scherberger,  
45 2018) independently of which arm would subsequently move, suggesting that preparatory  
46 activity is largely effector independent. However, activity during movement was more effector-  
47 dependent, for both premotor cortex and M1 (Cisek et al., 2003). Steinberg and colleagues  
48 (2002) reported similar single-neuron directional tuning regardless of which arm was moving,  
49 yet also found evidence for effector-dependent population-level encoding of direction.

50 If responses are effector-independent (i.e. similar regardless of the moving arm) then the  
51 relationship between hemispheres is necessarily simple: both contain the same information,  
52 encoded in the same manner. In contrast, if there exist strongly effector-dependent responses,  
53 that would raise additional questions. Are ‘lower-level’ signals (e.g., those describing muscle  
54 activity) more prevalent in the contralateral hemisphere? More generally, which signals are  
55 shared across hemispheres? How is neural activity structured such that only one arm moves even  
56 if both hemispheres are active?

57 We investigated these questions using a novel ‘cycling’ task, performed with either the left or  
58 right arm. We recorded neural activity from both hemispheres simultaneously. In separate  
59 sessions we recorded muscle activity bilaterally. Single neurons responded robustly regardless of  
60 which arm performed the task. Yet responses were strongly effector-dependent: for a given  
61 neuron, response patterns pertaining to the two arms were essentially unrelated. Despite  
62 profoundly effector-dependent single-neuron responses, we found no evidence that certain  
63 signals were present in one hemisphere but not the other. For example, muscle activity could be  
64 decoded equally well from contralateral or ipsilateral neural activity. More broadly, the  
65 population response across hemispheres appeared isomorphic; any signal present in one could  
66 also be found in the other. Thus, activity in a given hemisphere contains similar information  
67 during movement of one arm versus the other, yet that information is distributed very differently  
68 across single neurons. This might appear to yield a paradox: how can M1 be robustly active  
69 without driving the contralateral arm? A solution emerged when we examined the correlation  
70 structure between neurons, which changed dramatically depending on which arm was used. As a  
71 result, arm-specific signals were partitioned into orthogonal dimensions, allowing a simple  
72 decoder to naturally separate signals related to the two arms.

73

## 74 **Materials and Methods**

### 75 *Terminology*

76 We adopt the following terminology. For neurons in a given hemisphere, we refer to the  
77 contralateral arm as the “driven arm” (reflecting the strong connections to the contralateral spinal  
78 cord). We refer to the ipsilateral arm as the “non-driven arm.” Thus, for a neuron recorded from  
79 the right hemisphere, the left arm is the driven arm and the right arm is the non-driven arm. For  
80 the muscles, the driven arm is the arm upon which the muscle acts. Similarly, for a given arm,  
81 the contralateral cortex is referred to as the “driving cortex,” while the ipsilateral cortex is  
82 referred to as the “non-driving cortex.”

### 83 *Behavior*

84 All animal procedures were approved by the Columbia University Institutional Animal Care and  
85 Use Committee. Data were collected from two male monkeys (*Macaca mulatta*) while they  
86 performed a cycling task for juice reward. Experiments were controlled and data collected under  
87 computer control (Real-time Target Machine: Speedgoat, Liebfeld, Switzerland). While  
88 performing the task, each monkey sat in a custom primate chair with the head restrained via  
89 surgical implant. A screen displayed a virtual environment through which the monkey moved.  
90 The monkey grasped a custom pedal with each hand, with the hands lightly restrained with tape  
91 to keep them in a consistent position on the pedals. The pedal itself was also designed to  
92 encourage a consistent hand position, and included a handle and a brace that reduced wrist  
93 motion. Pedals turned a crank-shaft attached to a motor (Applied Motion Products, Watsonville,  
94 California, USA). A rotary encoder within the motor reported position with 1/8000 cycle  
95 precision. The motor used information regarding angular position and its derivatives to provide  
96 forces yielding virtual mass and viscosity.

97 Monkeys cycled the pedal to control their position in the virtual environment (Figure 1A). For a  
98 block of twenty consecutive trials, one arm was the “performing arm,” and the other was the  
99 “non-performing arm.” The angular position of the performing arm’s pedal was mapped directly  
100 to linear position in the virtual world. The non-performing arm’s pedal was required to remain  
101 within a window ( $\pm 0.05$  and  $\pm 0.07$  cycles for monkey E and F) centered at the bottom of the

102 cycle. Movement outside that window caused trial failure followed by a short time-out. Monkeys  
103 adopted a stereotyped position within the window and moved little from that position while  
104 cycling with the other pedal. The position range explored within a trial averaged 0.006 cycles  
105 (monkey E) and 0.029 cycles (monkey F). Following completion of each twenty-trial block, the  
106 next block was signaled by a 5-second period during which the motor delivered a gentle  
107 “buzzing” to the upcoming block’s performing arm. Blocks were presented in randomized order  
108 (Figure 1C). Monkeys also executed blocks of trials where both arms cycled together (bimanual  
109 task variant), which are not analyzed in this study.

110 During each trial, the monkey progressed from an initial target (a stationary white square on the  
111 ground) to a final target. The acceptance window was +/- 0.15 cycles for Monkey E and +/- 0.01  
112 cycles for Monkey F. While stopped, the motor provided slight forces to Monkey F’s performing  
113 arm to enable the pedal to remain in this very stereotyped position with minimal muscle  
114 activation. While holding, the monkey was also required to maintain the performing arm below a  
115 speed threshold: 0.01 cycles/s for Monkey E and 0.0125 cycles/s for Monkey F. At the start of  
116 each trial, the initial target appeared one to two cycles in front of the monkey. The monkey  
117 cycled to and acquired this target. After 1000-2000 ms (monkey E) or 600-1000 ms (monkey F)  
118 the initial target disappeared and the final target appeared seven cycles ahead of the current  
119 position. The monkey cycled to this final target. Once the final target was acquired, the monkey  
120 remained still within the target to receive a juice reward.

121 Within each twenty-trial block there were four behavioral conditions. These conditions varied in  
122 the starting position of the pedal and the required cycling direction (Figure 1C). The initial target  
123 was located such that the pedal position necessary to acquire that target was either at the top  
124 (top-start) or at the bottom (bottom-start). The final target was a whole number of cycles away,  
125 and was thus acquired with the same pedal position. ‘Forward’ and ‘backward’ conditions  
126 differed in the cycling direction necessary to progress through the virtual environment. During  
127 forward cycling, the hand moved away from the body at the top (much as the foot does when  
128 pedaling a bicycle). During backward cycling, the hand moved towards the body at the top.  
129 Cycling direction was cued by the color of the landscape in the virtual world: green for forward,  
130 orange for backward. Each of the four combinations of starting position and cycling direction

131 was performed in sub-blocks of 5 trials. Sub-block order was identical for each block (Figure  
132 1C).

### 133 *Surgical Procedures and neural recording*

134 Monkeys were anesthetized and a headcap was implanted under sterile conditions. A 19-mm  
135 diameter cylinder (Crist Instruments) was placed above the primary motor cortex of each  
136 hemisphere, guided by structural MRI performed prior to surgery. The skull remained intact  
137 under the cylinder, covered with a thin layer of dental acrylic. Prior to recording, monkeys were  
138 anesthetized and a 3.5-mm diameter burr hole was drilled by hand through the dental acrylic and  
139 skull, leaving the dura intact. Over the course of the experiment, multiple burr holes were opened  
140 at different locations. Following recording, burr holes were closed with dental acrylic, allowing  
141 the skull to heal.

142 After opening a burr hole, we first recorded neural activity using conventional single electrodes  
143 (Frederick Haer Company) to assess whether neurons in that location were task-modulated. We  
144 performed intracortical microstimulation and muscle palpations to confirm that recordings were  
145 within the arm region of M1. We then recorded neural activity with 24-channel V-Probes  
146 (Monkey E), or 32-channel S-Probes (Monkey F) (Plexon Inc, Dallas, Texas, USA). We lowered  
147 one probe into each hemisphere each day, removing the probe at the end of that session. Probes  
148 were moved to different locations within each burr hole on each recording day. Neural signals  
149 were processed and recorded using a Digital Hub and 128-channel Neural Signal Processor  
150 (Blackrock Microsystems, Salt Lake City, Utah, USA). Threshold crossings from each channel  
151 were recorded and spike-sorted offline (Plexon Offline Sorter). Unit isolation was assessed based  
152 on separation of waveforms in PCA-space, inter-spike interval histograms, and waveform  
153 stability over the course of the session. Analyses consider stable, well-isolated single and multi-  
154 unit isolations. Multi-unit isolations consisted of identifiable spikes (i.e., not merely threshold  
155 crossings) from two (or occasionally more) neurons that could not be distinguished with  
156 confidence. All example firing rates shown in figures are from single units. We recorded 263  
157 units in the left hemisphere and 270 units in the right hemisphere for monkey E, and 338 units in  
158 the left hemisphere and 279 units in the right hemisphere for monkey F.

159 *EMG recording*

160 On a separate set of days from the neural recordings, we recorded intramuscular EMG signals  
161 from the following muscles: Biceps brachii (long and short head), triceps brachii (medial, long,  
162 and lateral heads), deltoid (anterior, lateral, and posterior head), latissimus dorsi, pectoralis,  
163 trapezius, and brachioradialis. Pairs of hook-wire electrodes were inserted ~1cm into the belly of  
164 the muscle being recorded at the beginning of each session and removed at the end of the  
165 session. On each session, 1-3 EMG recordings were made per arm. Electrode voltages were  
166 amplified, bandpass filtered (10-500 Hz) and digitized at 1000 Hz (Monkey E) or 30000 Hz  
167 (Monkey F). Recordings were not considered further if they contained significant movement  
168 artifact or weak signals. Offline, EMG records were high-pass filtered at 40 Hz, rectified, and  
169 smoothed with a 25-ms Gaussian. This produced a measure of intensity versus time, which was  
170 then averaged across trials.

171 *Trial Averaged Firing Rates*

172 The spike times of each neuron on each trial were converted to a firing-rate by convolving spikes  
173 with a 25-ms Gaussian. To produce trial-averaged firing rates, we first aligned all trials on a  
174 common time: the moment when the first half-cycle was completed. This nicely aligned behavior  
175 across trials during the first cycle of each trial. However, because trials lasted multiple seconds,  
176 small differences in cycling speed could accumulate and cause considerable misalignment of  
177 behavior across trials (Figure 2A). The resulting misalignment of spikes (Figure 2B) would, if  
178 averaged without further alignment, yield an unrepresentative average firing rate (the same  
179 problem would impact averages of muscle activity and kinematic variables). Thus, the time-base  
180 on each trial was adjusted such that each cycle lasted 500 ms (excluding the first and last half-  
181 cycles), matching the typical 2 Hz cycling speed (Figure 2C). This procedure altered the time-  
182 base of individual trials very modestly, yet maintained appropriate alignment across trials  
183 (Figure 2D), and produced trial-averaged estimates of the firing rate (Figure 2E) that are  
184 representative of what occurred on single trials.

185 Figure 2D shows spike rasters to illustrate improved alignment of neural activity. However, we  
186 stress that spikes were always converted to rates before modification of the time-base. Thus, the



187 alignment procedure did not alter the values of the estimate of firing rate; it simply slightly  
188 modified when those values occurred.

189 Most analyses of firing rates employed the middle cycles (2-5), excluding the first cycle and the  
190 last two cycles. This focused analysis on the steady-state response, rather than on responses  
191 associated with starting, stopping, or holding. This aided interpretation in two ways. First,  
192 muscle activity in the non-performing arm was particularly weak during middle cycles (in  
193 contrast, modest activity was occasionally observed when stopping). Focusing on middle cycles  
194 largely sidesteps concerns that activity ipsilateral to the performing arm is related to muscle  
195 activity in the non-performing arm. Second, we wished to focus key analyses on the rhythmic  
196 pattern of firing rate modulation, rather than on overall changes in net firing rate when moving  
197 versus not moving. As one example, when predicting muscle activity from neural activity, it is  
198 relatively ‘easy’ to capture the generally elevated activity level during movement, resulting in  
199 high  $R^2$  values even if predictions fail to capture cycle-by-cycle activity patterns. We wished to  
200 avoid this, and to consider predictions successful only if they accounted for rhythmic response  
201 aspects.

## 202 *Single-neuron analyses*

203 We wished to compare, for each neuron, the strength of modulation when the driven versus non-  
204 driven arm performed the task. By modulation, we mean the degree to which a neuron’s firing  
205 rate varied within cycles, between cycles, and/or between conditions (forward versus backward,  
206 and top-start versus bottom-start). We compiled a single firing rate vector,  $\mathbf{r}_{driven}$ , concatenating  
207 the firing rate vectors across the four conditions where the driven arm performed the task.  
208  $\mathbf{r}_{driven}$  was thus of size  $ct$  where  $c$  is the number of conditions and  $t$  is the number of times  
209 during the middle cycles of one condition. We defined  $Modulation_{driven}$  as the standard  
210 deviation of  $\mathbf{r}_{driven}$ , which captures the degree to which the average firing rate varies across  
211 time and condition.  $Modulation_{non-driven}$  was computed analogously.

212 To assess the degree to which a neuron was more strongly modulated when the driven versus  
213 non-driven arm performed the task, we computed an arm preference index:

$$214 \frac{Modulation_{driven} - Modulation_{non-driven}}{Modulation_{driven} + Modulation_{non-driven}}$$

215 This arm preference index is zero if a neuron is equally modulated regardless of the arm used,  
216 approaches one if modulation is much larger when using the driven arm, and approaches  
217 negative one if modulation is much larger when using the non-driven arm.

### 218 *Firing-rate impact of small movements of the non-performing arm*

219 We wished to control for the possibility that neural responses, when the non-driven arm performs  
220 the task, might be related to small movements of the non-performing arm. For each trial, we  
221 computed the mean (absolute) speed of the non-performing arm. For each condition, we divided  
222 trials into those with speeds greater versus slower than the median. We did not apply this  
223 analysis if there were fewer than 8 trials for that condition. This could occur if a neuron was well  
224 isolated for only part of a recording session.

225 After dividing, we recomputed the mean firing rate for each of the two pools of trials, yielding  
226 one firing rate when the non-performing arm moved modestly, and another when it was virtually  
227 stationary. For each timepoint, we asked whether these two firing rates were more different than  
228 expected given sampling error. This was accomplished via a bootstrap in which trials were  
229 divided randomly, rather than based on speed. We performed 1000 such random divisions.  
230 Differences were considered significant if they were larger than for 95% of the random divisions.

### 231 *Normalization*

232 Because the absolute voltages of EMG traces are largely arbitrary, the scale of muscle activity  
233 could be quite different for different muscles. The response of each muscle was therefore  
234 normalized by its range. Neural responses were left un-normalized for single-neuron level  
235 analyses. However, for population-level analyses, responses were normalized to prevent results  
236 from being overly biased toward the properties of a few high-rate neurons. For example,  
237 principal component analysis seeks to capture maximum variance, and a neuron with a firing rate  
238 modulation of 100 spikes/s would contribute 25 times as much variance as a neuron with a  
239 modulation of 20 spikes/s. Reducing that discrepancy encourages principal component analysis  
240 to summarize the response of all neurons. For these reasons, we normalized the firing rate of  
241 each neuron, using the equation  $FR_{softnorm} = \frac{FR}{range(FR)+5}$ . The addition of 5 to the denominator  
242 produces ‘soft’ normalization, and ensures that we don’t magnify the activity of very low-rate

243 neurons. We have used this value previously (e.g., Lara et al. 2018 eLife; Russo et al. 2018  
244 Neuron) as it strikes a reasonable balance between focusing analysis on all neurons, while still  
245 allowing high firing-rate neurons to contribute somewhat more than very low-rate neurons.

#### 246 *Population Predictions*

247 To predict muscle activity from neural activity, we used Partial Least Squares (PLS) regression  
248 (plsregress in MATLAB). For each set of neurons  $X$  and muscles  $Y$ , PLS regression finds  
249 matrices  $W, V$ , that maximize the covariance between  $XW$  and  $YV$ , under the constraint that  $W$ ,  
250  $V$  are of rank  $r$  (which must be specified). PLS is similar to Canonical Correlation Analysis, in  
251 that it seeks linear transformations of the data that maximize similarity. However, Canonical  
252 Correlation Analysis maximizes correlation, and can therefore often be biased toward small  
253 dimensions which are coincidentally well-correlated. In contrast, PLS regression maximizes  
254 covariance and thus seeks correlated signals that are also high variance. Once  $W$  is found,  $Y$  is  
255 predicted from  $XW$  via standard linear regression. Employing  $XW$  (which has only  $r$  columns of  
256 regressors) rather than  $X$  (which has hundreds of columns) greatly reduces overfitting. An  
257 advantage of PLS regression is that the regularized solution respects not only the correlations in  
258  $X$  (as for PCA regression) but also the correlations in  $Y$ .

259 All predictions involved the middle cycles (2-5) of movement. We first picked one behavioral  
260 condition (e.g. top-start, forward, right hand performing) as our test condition. We then set the  
261 training condition to be the behavior with the same cycling direction but the opposite starting  
262 pedal position (e.g. bottom-start, forward, right hand performing). We first mean-centered the  
263 data, such that average neural and muscle activity was zero for each condition. We then ran PLS  
264 regression on the training condition to find a rank- $r$  matrix  $B$  that predicts muscle activity from  
265 neural activity. To select the optimal rank, we selected one cycle from our test condition to serve  
266 as validation data. We assessed performance on this validation cycle and selected the rank,  $r^*$ ,  
267 and the corresponding weight matrix,  $B^*$ , that generated the maximal validation  $R^2$ . We assessed  
268 prediction performance (generalization) on the remaining cycles of our test data. This procedure  
269 was repeated for each behavior and hemisphere. Generalization performance was assessed based

270 on population percent variance explained. We considered  $Y_{pred} = XB^*$ , and computed  $R^2 = 1 -$   
271  $\frac{\|Y - Y_{pred}\|_f^2}{\|Y\|_f^2}$ , where  $\|\cdot\|_f$  indicates the Frobenius norm.

272 We used a similar procedure to assess how well neural activity could be predicted from neurons  
273 in the same or opposite hemisphere. We randomly divided driving-cortex neurons into two  
274 halves:  $X_{driving}$  and  $Y_{driving}$ . We also considered a random subpopulation of non-driving cortex  
275 neurons,  $X_{non-driving}$ , selected to have the same number of columns (neurons) as  $X_{driving}$ .  
276 Using PLS regression, we calculated generalization performance,  $R_{driving}^2$ , when predicting  
277  $Y_{driving}$  from  $X_{driving}$ . We similarly computed  $R_{non-driving}^2$  when predicting  $Y_{driving}$  from  
278  $X_{non-driving}$ . We used the same train/validate/test procedure described above, assessing  
279 generalization performance on a held-out condition. We repeated this process with 125 different  
280 random divisions per condition, yielding a total of 1000 values of  $R_{driving}^2$  and  $R_{non-driving}^2$  per  
281 monkey.

## 282 *Dimensionality Reduction*

283 Dimensionality reduction was performed via principle components analysis (PCA). We typically  
284 ran PCA on neural data from a sub-set of behavioral conditions. We concatenated neurons' soft-  
285 normalized FRs from the desired conditions to generate a data matrix  $A$  of size  $(c \times t, n)$ , where  
286  $c$  was the number of conditions,  $t$  was the number of timepoints included per condition, and  $n$   
287 was the number of neurons. We applied PCA to  $A$  to obtain matrices  $X$  and  $V$  such that  $X = AV$ ,  
288 where  $X$  is the projection of the data onto the principal components (PCs) and  $V$  contains the  
289 weights from neurons to PCs. To project other behavioral conditions into the same space, we  
290 could construct a new data matrix  $A'$  using these conditions' FRs. We then multiply by  $V$ , such  
291 that the new projections  $X'$  are defined by  $X' = A'V$ .

## 292 *Trajectory Tangling*

293 We assessed trajectory tangling as described in (Russo et al., 2018). To parallel the other analyses  
294 of population activity, trajectory tangling was computed for the middle cycles. Neural activity  
295 (or muscle activity) was reduced to the top eight dimensions using PCA. We then calculated  
296 tangling,  $Q(t)$ , at each time point:

297 
$$Q(t) = \max_{t'} \frac{\|\dot{x}_t - \dot{x}_{t'}\|^2}{\|x_t - x_{t'}\|^2 + \varepsilon}$$

298 where  $x_t$  is the neural state at time  $t$ ,  $\dot{x}_t$  is the temporal derivative of the neural state,  $\|\cdot\|$  is the  
299 Euclidean norm, and  $\varepsilon$  is a small constant that prevents division by zero (here, set to 10% of the  
300 total neural variance across the top eight dimensions).  $Q(t)$  is large if the neural state at time  $t$  is  
301 close to the neural state at a different time, but the two states have very different derivatives.

302 Trajectory tangling was computed across all times for a given set of conditions – e.g. all  
303 conditions where the right arm performed the task. Thus,  $t$  indexes across all times and  
304 conditions for one arm. Trajectory tangling was computed separately for each hemisphere, and  
305 for the muscle population in each arm. For a given quantity (e.g., muscle activity) the two  
306 distributions (one per arm) for that monkey were combined and the cumulative density was  
307 computed.

### 308 *Predicting non-performing arm EMG*

309 Above we described our methodology for assessing how well neural activity in a given  
310 hemisphere predicts muscle activity in the arm performing the task. We used a similar  
311 methodology to address a related but different question: whether a unified linear decoder, based  
312 on activity across both hemispheres, can predict muscle activity both when that arm performs the  
313 task (and robust EMG needed to be decoded) and when the other arm performs the task (and  
314 near-zero EMG should be decoded). As above, we used PLS regression and focused on the  
315 middle cycles. For this analysis, we predict EMG activity using all neurons, regardless of  
316 hemisphere.

317 We first assessed generalization performance using a ‘train-moving’ decoder, which was trained  
318 using only conditions where the relevant arm performed the task, and was then asked to  
319 generalize to conditions where the arm did not move. This is a potentially challenging form of  
320 generalization, as the decoder must predict EMG activity in a situation (arm not moving) very  
321 different from the situation in which it was trained (arm moving). We also computed  
322 generalization performance of a ‘train-both’ decoder, trained using a set of conditions that  
323 included the relevant arm performing and not performing the task. Generalization was to left-out  
324 conditions of each type.

325 For the train-moving decoder, we used the following division of training, validation, and testing,  
326 conditions: *Training*: Direction 1, Start Position 1, Arm moving. *Validation*: Direction 1, Start  
327 Position 2, Arm moving (one cycle). *Testing*: Direction 1, Start Position 2, Other arm moving.  
328 For the train-both decoder, we used the following division of training, validation, and testing:  
329 *Training*: Direction 1, Start Position 1, Arm moving and Direction 1, Start Position 1, Other arm  
330 Moving. *Validation*: Direction 1, Start Position 2, Arm moving (one cycle). *Testing*: Direction 1,  
331 Start Position 2, Other arm moving.

## 332 **Results**

### 333 *Behavior*

334 Two monkeys (E and F) were trained on a cycling task that could be performed with either arm  
335 (Figure 1A). Left and right hands each grasped a pedal. Monkeys performed blocks of left-hand  
336 and right-hand trials. Cycling the correct pedal produced motion through the virtual environment.  
337 Success required that the non-performing arm be kept still. On each trial, monkeys cycled from  
338 one target to another, located seven cycles away (Figure 1B). Targets were positioned so that  
339 cycling started and ended either at the top of the cycle ('top start') or at the bottom of the cycle  
340 ('bottom start').

341 Each combination of starting position and cycling direction was performed for five consecutive  
342 trials. The order of the four combinations was consistent within each 20-trial block (Figure 1C).  
343 Monkeys performed an average of 29 and 21 trials per condition per day (monkey E and F,  
344 respectively). Monkeys cycled quickly, with a median angular speed of 2.2 Hz and 1.8 Hz  
345 (monkey E and F; Figure 1D,E). In contrast, the non-performing hand moved very little (leftmost  
346 distributions in Figure 1D,E). Mean angular speed for the non-performing arm was 0.0016  
347 cycles/s and 0.024 cycles/s (monkey E and F).

### 348 *Neural and muscle responses*

349 We examined the average firing rate of neurons recorded in each hemisphere of M1 (1150 total  
350 isolations across two hemispheres and both monkeys). Firing rates were computed after  
351 temporally aligning behavior across trials (Figure 2). Neural responses were typically rhythmic  
352 (Figure 3E-H), and could be nearly sinusoidal (Figure 3E) or could contain additional higher-  
353 frequency structure (Figure 3G). For comparison, we recorded the activity of the major muscles  
354 in both arms (48 total recordings). The temporal features of muscle responses (Figure 3A-D) in  
355 many ways resembled those of single-neuron responses. However, muscles and neurons were  
356 quite different in the degree to which responses were restricted to movements of a single arm.  
357 Muscles exhibited robust activity only when their driven arm performed the task (Figure 3A-D).  
358 E.g., the left anterior deltoid (Figure 3A) was active when the left arm performed the task (*blue*)  
359 but not when the right arm performed the task (*red*). While expected, this direct confirmation is

360 important because of the possibility that muscles might have been active in ways that didn't  
361 move the pedal (e.g., co-contraction). Such activity could potentially have been substantial,  
362 complicating interpretation of neural activity. A few muscles exhibited weak activity when the  
363 task was performed by their non-driven arm (Figure 3A,C). However, this typically occurred  
364 only at the end of movement, consistent with tensing to aid stability during stopping.

365 In contrast to the muscles, neurons were typically active throughout the movement, regardless of  
366 whether the task was performed with their driven or non-driven arm. A few neurons were active  
367 only when cycling with the driven arm (Figure 3E), and on rare occasions a neuron was active  
368 only when cycling with the non-driven arm (Figure 3H). However, most neurons were active in  
369 both situations (Figure 3F,G). Furthermore, neural responses could be quite different when  
370 cycling with the driven versus non-driven arm. Neural response patterns could change in both  
371 phase (Figure 3F) and structure (Figure 3G) depending on which arm performed the task.

#### 372 *Single-neurons are active during movements of either arm*

373 To quantify the arm preference of individual neurons, we compared firing-rate modulation when  
374 the task was performed with the driven versus non-driven arm. Modulation was assessed as the  
375 standard deviation of the firing rate across timepoints, which captures the degree to which  
376 activity evolves with time. Average modulation was computed once across all conditions where  
377 the driven arm performed the task, and again across all conditions where the non-driven arm  
378 performed the task. We analyzed only the middle cycles of movement (excluding the first cycle  
379 and the last two cycles). This allowed us to quantify the “steady state” performance of the  
380 neurons, without starting and stopping transients, and aided comparison with the muscles. We  
381 computed an ‘arm preference index’: the difference in modulation for the driven versus non-  
382 driven arm, divided by the sum. This index ranges from -1 to 1, with the extremes indicating  
383 complete preference for the non-driven and driven arms respectively. An arm preference index of  
384 zero indicates that a neuron was equally responsive regardless of the arm being used.

385 To establish a baseline for comparison, we computed the arm preference index for each muscle.  
386 Arm preference indices were typically high for the muscles, confirming that muscles were active  
387 primarily when the task was performed with their driven arm. A few muscles showed weak  
388 activation regardless of the arm being used, resulting in lower indices. However, most muscles



389 had robust responses, and were much more active when the task was performed with the driven  
390 arm. For both monkeys, the median arm preference index was near unity (Figure 4A E: 0.86; F:  
391 0.98; *blue dots*) and the modal response occurred at unity.

392 In contrast, neurons rarely had arm preference indices near unity (Figure 4B). Instead, the  
393 distribution of arm preference indices was centered slightly above zero (median = 0.07 and 0.31  
394 for the two monkeys). Thus, neural responses were much more likely than muscle responses to  
395 be similar in magnitude regardless of which arm performed the task. Furthermore, many neurons  
396 had arm preference indices  $< 0$ , indicating stronger modulation when the non-driven arm  
397 performed the task (Monkey E: 201/533 neurons; Monkey F: 107/617 neurons).

398 Thus, neurons can be quite active even when the task is performed with their non-driven arm.  
399 Might such responses be related to small movements of the driven arm? This explanation is  
400 unlikely *a priori*. As described above, movements of the non-performing arm were small (Figure  
401 1D,E) and corresponding muscle activity was weak (Figure 4A). In principle, neural responses  
402 related to weak muscle activity might be magnified via normalization or some other non-  
403 linearity. However, such magnification would need to be very strong. To match the median  
404 neural arm preference indices, muscle activity in the non-performing arm would need to be  
405 magnified by a factor of 12 (monkey E) and 52 (monkey F). Furthermore, magnification cannot  
406 account for the finding that neurons commonly had negative arm preference indices, while  
407 muscles rarely (monkey E) or never (monkey F) did.

408 We performed an additional control to ask whether neural responses, when the non-driven arm  
409 performed the task, were influenced by small movements of the driven arm. Such movements  
410 varied across trials (Figure 5A), allowing us to divide trials into those with movements larger  
411 than the median (very modest movement, *red*) versus lower than the median (nearly stationary,  
412 *black*). Average firing rates were very similar in these two cases, as illustrated for one example  
413 neuron in Figure 5B. Differences were significant at only a few moments (*black dots*,  $p < 0.05$   
414 via bootstrap across 1000 resamples). Those differences were small, and occurred at roughly the  
415 rate (5%) expected by chance. Across all neurons, 5% of data-points showed significant  
416 differences (Figure 5C,D). This equals the percentage expected by chance, and is thus consistent  
417 with no reliable impact of small movements. Applying this same analysis to the (weak) muscle  
418 activity in the non-moving arm revealed significant differences at double the chance rate (10% of

419 data-points) and peaking at four times the chance rate near the end of the movement (21% of  
420 data-points).

421 In summary, muscles were silent or at most weakly active when the task was performed with  
422 their non-driven arm. The weak activity that was present was statistically coupled to small  
423 movements of the driven arm. In contrast, neural responses were typically robust during  
424 movements of the non-driven arm, were present throughout the movement (not just at the end)  
425 and were not statistically linked to small movements of the driven arm. Prior studies have found  
426 that neurons can be active when a task is performed with their non-driven arm, although to  
427 varying degrees (Cisek et al., 2003; Donchin et al., 1998; Kermadi et al., 1998; Tanji et al.,  
428 1988). The present findings replicate the finding of weakly lateralized responses in motor cortex,  
429 and largely rule out potential explanations based on small residual movements of the driven arm.

#### 430 *Neural response patterns are limb-dependent*

431 One plausible explanation for weakly lateralized responses is that neural activity encodes higher-  
432 level, limb-independent features of movement. For example, activity might encode hand  
433 velocity, movement goal, or some other quantity, regardless of which limb is moving.  
434 Preparatory activity in the more anterior rostral premotor cortex (Cisek et al., 2003) can exhibit  
435 largely limb-independent responses. Might this also be true in motor cortex during movement?  
436 The two arms performed very similar movements in our task. Thus, limb-independence should  
437 be reflected by similar neural responses regardless of the performing arm. Instead, neural  
438 responses were strongly limb-dependent. Responses often differed in phase (Figure 3F) and/or  
439 structure (Figure 3G) depending on which arm performed the task.

440 To provide quantification, for each neuron we computed the correlation between the firing rate  
441 patterns when the driven versus non-driven arm performed the task (Figure 4C). Analysis  
442 considered only the middle cycles (2-5). This ensured that high correlations indicate similar  
443 response patterns, not simply firing rates that rise non-specifically during movement. On average  
444 the correlation was near zero (median correlation: 0.16 and 0.08 for Monkey E and F). Strongly  
445 correlated responses were very much the minority: only 18/533 (E) and 9/617 (F) neurons had  
446 correlations  $\geq 0.75$ . Thus, for a given neuron, there was remarkably little relationship between  
447 responses when the task was performed with the driven versus non-driven arm. We used a

448 shuffle manipulation to estimate the distribution of correlations if there were in fact no  
449 relationship. Each neuron's response was matched with that of another random neuron, yielding  
450 a distribution of correlations expected by chance given the range of response patterns present in  
451 the data (*green*). The empirical distribution (*black*) was only modestly more positive than the  
452 chance distribution.

453 Might correlations appear artificially low if responses are weak or noisy? While sampling error  
454 will inevitably reduce correlations, this is unlikely to be the source of the low correlations we  
455 observed. Cycling evoked particularly strong neural responses with correspondingly small  
456 standard errors of the mean firing rate (Figure 3E-H, envelopes show SEM). We further  
457 addressed this concern by computing, for each neuron, the correlation between the firing rate for  
458 the top-start versus bottom-start conditions. Behavior was very similar for these two conditions  
459 during the middle cycles (after aligning phase), and correlations should thus be high. This was  
460 indeed the case (Figure 4C, orange distributions), confirming that sampling error did not impede  
461 the ability to measure high correlations.

462 These results rule out the hypothesis of a representation that is predominantly effector-  
463 independent. Individual-neurons showed very different responses depending on which arm  
464 performed the task – almost as different as if there were no relationship between the activity  
465 patterns associated with the two arms.

#### 466 *Correlations between neurons are limb-dependent*

467 Consider two neurons that have similar response patterns when the task is performed with the  
468 driven arm (Figure 6A-D plots four such example pairs). What occurs when the task is  
469 performed with the non-driven arm? From the analysis above, we know that the response pattern  
470 of each neuron will change. Does this occur in a coordinated fashion, such that the two neurons  
471 remain correlated with one another? This would be consistent with the idea that neurons with  
472 related responses 'encode' related features, and continue to do so in new contexts. In fact, this  
473 property was rarely observed. We did occasionally observe neurons that were strongly correlated  
474 when the driven arm performed the task, and remained strongly correlated when the non-driven  
475 arm performed the task (Figure 6A). Yet it was also common for correlations to invert (Figure

476 6B), for strong correlations to disappear (Figure 6C), or for neurons to undergo very different  
477 changes in response magnitude (Figure 6D).

478 We computed correlation matrices to quantify such effects across the population. To aid  
479 visualization, we ordered neurons to group responses that were similar when the task was  
480 performed with the driven arm, resulting in a block structure (Figure 6E-F, *left*). We asked  
481 whether this correlation structure remained similar when the task was performed with the non-  
482 driven arm. Note that it is possible for the correlation matrix to remain identical, even if every  
483 neuron changes its response, so long as correlated neurons remain correlated. Instead, the  
484 correlation structure was dramatically altered. As a result, the original ordering no longer groups  
485 neurons with similar response properties (*right column* of Figure 6E-F).

486 This change in correlation structure was not due to correlations being largely spurious, as could  
487 occur if estimated firing rates were noisy. To investigate this possibility, we asked whether the  
488 correlation structure differed between conditions where cycling started at the top of the cycle  
489 rather than at the bottom. The correlation structure was very similar in these two cases (compare  
490 *middle* and *left columns* of Figure 6E-F). This finding rules out the possibility that correlations  
491 are unstable simply because they are spurious, and demonstrates that not just any change in the  
492 task results in a change in the correlation structure. Changing the starting position had relatively  
493 little impact, while changing the performing arm had a dramatic impact.

494 Each matrix in Figure 6E-F corresponds to a given condition (a starting position and cycling  
495 direction). We wished to summarize, across all such conditions, the degree to which correlations  
496 are or aren't preserved when the task is performed with one arm versus the other. To do so, for  
497 each condition and each pair of neurons we plotted their firing-rate correlation when the non-  
498 driven arm performed the task versus their correlation when the driven arm performed the task  
499 (Figure 6G). This is equivalent to plotting the values of the non-driven-arm correlation matrix  
500 (*right column* of Figure 6E,F) versus the corresponding values of the driven-arm correlation  
501 matrix (*left column*). Preserved correlations would yield diagonal structure. In fact, there was  
502 little tendency for correlated neurons to remain correlated, or for anti-correlated neurons to  
503 remain anti-correlated. The 'meta-correlation' was 0.1 and 0.05 (monkey E and F). Thus, if two  
504 neurons responded similarly when the driven arm performed the task, this said little regarding  
505 whether those neurons would respond similarly when the non-driven arm performed the task.

506 *Population activity is isomorphic across hemispheres*

507 The above results demonstrate that both individual-neuron responses and their correlation  
508 structure are very different depending on which arm is employed to perform the task. One  
509 potential explanation is that very different signals are present: perhaps muscle-like signals when  
510 employing the driven arm versus more abstract signals when employing the non-driven arm. An  
511 alternative explanation is that many of the same signals are present, yet are reflected differently  
512 at the level of individual neurons. We have argued that motor cortex carries both muscle-like  
513 signals and non-muscle-like signals fundamental to the underlying computations (Churchland et  
514 al., 2012; Russo et al., 2018). However, those experiments examined only the driving cortex; it  
515 remains unknown which signals are shared with the non-driving motor cortex.

516 We first asked whether muscle-like signals are present in both hemispheres. We trained a  
517 regularized linear decoder to predict performing-arm muscle activity based on neural activity.  
518 We assessed generalization to a held-out condition, repeating this procedure for each condition.  
519 Both the driving and non-driving cortex accurately predicted muscle activity (Figure 7A). Across  
520 all conditions, generalization  $R^2$  was high for both the driving and non-cortex (Figure 7B,  
521 generalization performance computed across all muscles). Generalization performance was lower  
522 for the non-driving cortex, but this was a small effect and was significant for only one monkey ( $p$   
523 = 0.15 and  $p$  = 0.016 for monkey E and F, two-sided Wilcoxon signed rank test across 8  
524 conditions). We thus saw no evidence that signals related to muscle activity were absent in the  
525 non-driving cortex.

526 Might other signals be restricted to the driving cortex? Rather than attempting to infer specific  
527 candidate signals, we developed a method to address this question generically (Figure 7C, top).  
528 We randomly divided driving-cortex neurons into two groups. Because the division is random  
529 and the number of neurons large, each group should reflect approximately the same set of  
530 signals. Thus, one group should be able to accurately predict activity in the other group. This was  
531 indeed the case (Figure 7C, 'Driving Predicts'). We next generated a size-matched group of  
532 neurons from the non-driving cortex, and asked whether their activity could be used to predict  
533 activity in the driving cortex. If all signals are present in both hemispheres, it should be possible  
534 to predict driving-cortex activity based on non-driving cortex activity. Conversely, if a major  
535 signal is missing in the non-driving hemisphere, prediction would be compromised.

536 Driving cortex activity was predicted almost as well, based on activity in the opposite  
537 hemisphere, as it had been based on activity within the same hemisphere (Figure 7C, thin lines  
538 show results for 1000 random divisions). For Monkey E, the difference was non-significant ( $p =$   
539 0.16, bootstrap test across 1000 resamples). For Monkey F, the difference was significant but  
540 small: a loss of 5% of the variance explained ( $p = 0.001$ , bootstrap across 1000 resamples). Thus,  
541 we saw no evidence for large signals that are present in the driving cortex but absent in the non-  
542 driving cortex.

#### 543 *Neural trajectory tangling is low for both hemispheres*

544 We recently described a major difference between M1 population activity and downstream  
545 muscle activity (Russo et al., 2018). Only M1 avoids ‘trajectory tangling,’ defined as the  
546 occurrence of similar population states with very different derivatives. Trajectory tangling  
547 becomes high if the population trajectory crosses itself, or if the trajectory for one condition  
548 traverses near that for another condition but travels in a different direction. Pattern-generating  
549 recurrent networks are noise-robust only if trajectory tangling is low, suggesting an explanation  
550 for why low trajectory tangling was observed in M1. It is unknown whether the non-driving  
551 cortex participates (via callosal connections) in pattern generation. We therefore wondered  
552 whether the non-driving cortex would show similarly low trajectory tangling. Notably, it is  
553 possible for a cortical area to be active during cycling yet have high trajectory tangling; this was  
554 true of proprioceptive primary somatosensory cortex (Russo et al., 2018).

555 We computed the tangling index (as used in Russo et al. 2018) for every time during the middle  
556 cycles, across all conditions. We did so for population activity in the driving and non-driving  
557 cortex, and also for the muscle populations, and compared the resulting distributions. The  
558 muscles often showed high trajectory tangling, revealed by a long right tail in the cumulative  
559 distributions (Figure 8A,B, *black lines*). The driving cortex displayed consistently low trajectory  
560 tangling: cumulative distributions (*blue*) plateaued early. This replicates prior results: trajectory  
561 tangling is much lower for the driving cortex than for the downstream muscle population.  
562 Notably, this is true even though single-neuron and single-muscle responses are superficially  
563 similar.

564 Trajectory tangling was also low for the non-driving cortex (*red*). For monkey E, tangling was  
565 slightly higher in the non-driving versus driving cortex ( $468 \pm 201$  versus  $420 \pm 153$ ; mean  $\pm$   
566 S.D.) while the opposite was true for monkey F ( $374 \pm 105$  versus  $430 \pm 146$ ). Thus, trajectory  
567 tangling is similarly low for both cortices, with only small and inconsistent differences.  
568 Critically, for both the driving and non-driving cortex, neural trajectory tangling was much lower  
569 than muscle trajectory tangling. The latter averaged  $2296 \pm 1766$  for Monkey E and  $4392 \pm 2950$   
570 for Monkey F. Taken together with the results above, we found little hemispheric difference  
571 regarding either the major signals or the organization of population trajectories.

572 *Neural activity occupies different dimensions for movements of different arms*

573 If similar signals are present regardless of which arm moves, how does the brain avoid moving  
574 the wrong arm? In confronting this question, we took inspiration from recent work suggesting  
575 that only some neural dimensions in motor cortex are ‘muscle potent’; activity in those  
576 dimensions produces output that will influence the muscles. Other dimensions are ‘muscle null’;  
577 activity in those dimensions has no direct outgoing impact on muscle activity (Druckmann and  
578 Chklovskii, 2012; Kaufman et al., 2014). The presence of output-null dimensions is natural (and  
579 typically inevitable) when patterns are generated by a recurrent network with more internally-  
580 connected neurons than output neurons. We wondered whether this principle might apply to the  
581 present case. We considered all recorded neurons, across both hemispheres, as a unified  
582 population. We asked whether signals related to the movement of each arm are partitioned in a  
583 manner that could allow signals related to one arm to naturally avoid impacting the other arm.

584 We used principal component analysis (PCA) to find neural dimensions that best explain  
585 activity. We applied PCA once for conditions where the right arm performed the task (‘right-  
586 performing’ conditions) and again for conditions where the left arm performed the task (‘left-  
587 performing’ conditions). A ‘right-arm’ space was defined by the PCs found for the right-  
588 performing conditions. A ‘left-arm’ space was defined analogously. We were interested in what  
589 occurred in the right-arm space when the left arm performed the task, and vice versa.

590 Importantly, in both cases PCA considered the responses of the same unified population of  
591 neurons (all recorded neurons across both hemispheres).

592 The right-arm space captured (by construction) population activity when the right arm performed  
593 the task. This can be appreciated in Figure 9A,C by the large near-circular trajectories for the  
594 right-performing conditions (*red*). The rapid rise in cumulative variance accounted for (Figure  
595 9B,D, *red*) reveals that a small number of right-arm PCs successfully captured most of the  
596 variance for the right-performing conditions. In contrast, the right-arm space did not effectively  
597 capture variance for the left-performing conditions. Left-performing neural trajectories are small  
598 when projected onto the right-arm PCs, with little clear structure (Figure 9A,C, *blue*). The  
599 cumulative percent variance accounted for (left-performing conditions projected onto the right-  
600 arm PCs) rose slowly (Figure 9B,D, *blue*). Analogous results were found when analyzing the  
601 left-arm space (Figure 9E-H).

602 Thus, relatively little variance was captured when activity for left-performing conditions was  
603 projected onto the right-arm space, and vice versa. Averaged across all such conditions, the top 5  
604 PCs explained  $7 \pm 1\%$  (monkey E) and  $2 \pm 0.5\%$  (monkey F) of the variance (mean  $\pm$  std.  
605 computed across conditions). This was in contrast to the large amount of variance captured when  
606 conditions were projected onto the top 5 PCs of their ‘own’ space:  $80 \pm 2\%$  (monkey E) and  $80 \pm$   
607  $2\%$  (monkey F). This asymmetry was not simply due to projecting onto a space built from the  
608 same data versus other data. For example, the top 5 PCs based on top-start conditions captured  
609 almost as much variance during bottom-start conditions ( $63 \pm 4\%$  for monkey E and  $66 \pm 2\%$  for  
610 monkey F) as during top-start conditions ( $79 \pm 2\%$  and  $79 \pm 2\%$ ).

611 Thus, neural responses related to the two arms occupy nearly orthogonal subspaces. Dimensions  
612 that robustly capture activity when one arm performs the task do not continue to do so when the  
613 other arm performs the task. This could occur trivially if neurons fall into two groups: neurons  
614 that respond only when the right arm performs the task, and neurons that perform only when the  
615 left arm performs the task. However, as documented above, no such separation was present. The  
616 distribution of arm preference indices was unimodal with a median near zero (Figure 4B)  
617 indicating that most neurons responded regardless of which arm performed the task. The  
618 orthogonality of dimensions is instead related to the finding that the correlation structure depends  
619 strongly on which arm performs the task (Figure 6). As such, this is intrinsically a population-  
620 level finding that could not have been inferred from analyses focused on individual neurons.



621 *Linear decoders naturally separate signals related to the two arms*

622 The separation of activity into orthogonal subspaces may allow descending control of one arm to  
623 naturally ignore signals related to the other arm. To test the plausibility of this hypothesis, we  
624 trained linear decoders to predict, based on the activity of the entire neural population, muscle  
625 activity for a given arm. The decoder was trained only using conditions where that arm  
626 performed the task. For example, the decoder was trained to predict muscle activity in the right  
627 arm while the right arm performed the task. Restricted to this situation, decoders performed well,  
628 predicting a median of 91% (Monkey E) and 93% (Monkey F) of the variance on held-out  
629 conditions. Examples of predicted muscle activity (Figure 10A,D, *orange traces at top*) are  
630 shown for one muscle for each monkey. We then assessed generalization to conditions where the  
631 other arm performed the task. For example, a decoder that fit right-arm muscle activity (trained  
632 only on right-performing conditions) was asked to generalize and predict right-arm muscle  
633 activity during left-performing conditions. Does the prediction stay relatively flat, accurately  
634 capturing the absence of muscle activity? Or does the decoder become contaminated by signals  
635 related to the performing arm?

636 Decoders accurately generalized, and predicted little modulation of muscle activity in the non-  
637 performing arm. For the two example muscles shown, the predicted muscle activity was  
638 relatively flat, in agreement with the lack of modulation of the empirical muscle activity (Figure  
639 10A,D, *bottom*, compare *orange* and *black traces*). This was true across muscles and conditions:  
640 decoded muscle activity was only weakly modulated for conditions when the task was performed  
641 with the other arm (Figure 10 B,E, *orange*), even though the decoder was not trained on such  
642 conditions and even though the neural activity upon which the decoder was based was similarly  
643 modulated regardless of the performing arm. The ability of the decoder to ignore such activity  
644 was inherited from the orthogonality of subspaces described above. When trained using right-  
645 arm conditions, decoders naturally employ right-arm dimensions. Because those dimensions are  
646 largely unoccupied when the left arm performs the task, the decode shows minimal modulation.  
647 Due to these properties, decoders naturally produce predicted muscle activity with positive arm-  
648 preference indices (Figure 10C, *orange histograms*). These distributions are right-shifted relative  
649 to those for the neural activity upon which decoding was based (*red histogram*). Thus, the

650 structure of population activity ensures that a decoder, trained to extract activity related to one  
651 arm, will naturally tend to ignore activity related to the other arm.

652 Yet while decoders tended to naturally ignore activity related to the ‘wrong’ arm, this feature  
653 was imperfect: small amounts of residual modulation were still present (Figure 10A,D, orange  
654 trace at bottom) leading to arm-preference indices smaller than those of the muscles. Of course,  
655 one would expect improved ability to segregate activity if a decoder is trained to do so: i.e., to  
656 predict muscle activity both when the muscle is strongly modulated (when the relevant arm  
657 performs the task) and also when it is not (when the other arm performs the task). This was  
658 indeed the case (Figure 10, *green*). Note that these decoders still had to generalize to left-out  
659 conditions; they simply had the benefit of training data that included both left- and right-  
660 performing conditions.

661 There is thus no paradox in the absence of muscle activity in the non-performing arm, despite  
662 robust neural activity across both hemispheres. Signals related to the two arms are separated into  
663 different neural subspaces. As a result, even simple linear decoders naturally separate signals  
664 related to one arm versus the other.

## 665 **Discussion**

666 We found that neural signals related to movements of the right and left arms are anatomically  
667 intertwined. Signals were mixed across hemispheres; when one arm moved, neurons in both  
668 hemispheres were modulated. Signals were also mixed across neurons; most neurons responded  
669 when both their driven and their non-driven arm performed the task. Individual neurons  
670 responded very differently depending on which arm was moving. Yet at the level of the  
671 population, both hemispheres contained similar information. Surprisingly, we did not find signals  
672 that were strongly present in the driving cortex but absent in the non-driving cortex. This was  
673 true even for muscle-like signals, which could be decoded similarly well from either hemisphere.  
674 Despite this intermixing, signals corresponding to the two arms were highly separable at the  
675 level of neural dimensions. Activity related to the left arm occupied a set of dimensions nearly  
676 orthogonal to the dimensions occupied by activity related to the right arm. As a result, even  
677 simple linear decoders could read out commands for one arm while ignoring commands for the  
678 other arm.

### 679 *Separation of information across dimensions is a common feature of cortical activity*

680 Our results contribute to an increasingly broad set of studies reporting that neural activity related  
681 to different computations or task parameters is often separated across neural dimensions, instead  
682 of at the level of brain areas or individual neurons. During reaching, dimensions carrying  
683 preparatory activity are orthogonal to dimensions carrying muscle-related signals (Kaufman et  
684 al., 2014), and more generally to all dimensions occupied by movement-related activity (Elsayed  
685 et al., 2016). Activity related to the timing of movement initiation and activity related to which  
686 movement is being generated also occupy orthogonal dimensions (Kaufman et al., 2016). In  
687 sensory decision making, different aspects of the task (e.g., stimulus versus task time, color  
688 versus direction of the stimulus, or auditory versus visual cues) are integrated in different neural  
689 dimensions in prefrontal cortex (Machens et al., 2010; Mante et al., 2013) and parietal cortex  
690 (Raposo et al., 2014). Separating neural activity into separate dimensions for separate  
691 computations may thus be a general strategy used by many brain regions. A potential advantage  
692 of this strategy is that signals are able to interact (e.g., in the case where movements of two limbs

693 are coordinated) yet can still be read out separately (Druckmann and Chklovskii, 2012; Kaufman  
694 et al., 2014)

695 *Comparison with prior studies of lateralization in M1*

696 Our finding that individual neurons often respond during movements of either arm is in broad  
697 agreement with prior primate recording studies. A majority of these studies describe intermixing  
698 of right- and left-arm responses in the activity of individual M1 neurons (Cisek et al., 2003;  
699 Donchin et al., 2002, 1998; Kermadi et al., 1998; Steinberg et al., 2002). However, a handful of  
700 these studies report a much smaller percentage of ipsilateral (non-driving) neural responses  
701 (Aizawa et al., 1990; Tanji et al., 1988). These studies examined neural responses in the hand  
702 area of M1 during small finger movements. The hand area of M1 has fewer callosal connections  
703 and fewer ipsilateral projections than the arm area of M1 has (Jenny, 1979; Jones and Wise,  
704 1977; Rouiller et al., 1994). Thus, a likely explanation for varied prior results is that hand-related  
705 neural computations are more divided by hemisphere, while arm-related computations are largely  
706 intermixed. An alternative explanation is that it is simply easier to move one hand while keeping  
707 the other still, resulting in greater neural segregation due to better experimental control over  
708 lateralization of muscle activity. Our results support the first explanation; muscle activity was  
709 weak in the non-driven arm, and the very small movements of that arm had no statistical impact  
710 on neural activity.

711 Of prior studies, two explicitly compared neural response properties (e.g., preferred directions)  
712 during unimanual movements of each arm. Cisek et al. (2003) found that neurons in M1 had  
713 limb-dependent preferred directions, yet Steinberg et al. (2002) reported preserved preferred  
714 directions. At the same time, Steinberg et al. found that left-arm and right-arm reach directions  
715 could be independently decoded by separate pools of neurons, suggesting some degree of limb-  
716 dependence. The present findings indicate that neural responses are strongly limb-dependent.  
717 Responses during performance with one versus the other arm were weakly correlated at the  
718 single-neuron level, and occupied nearly orthogonal subspaces at the population level.

719 *Possible reasons for ipsilateral motor cortical activity*

720 There exist multiple reasons why motor cortex might be active when the non-driving arm  
721 performs the task. A straightforward possibility is that motor cortex employs an abstract limb-  
722 independent representation of movement. However, this hypothesis is unlikely given the strongly  
723 limb-dependent nature of responses. Alternatively, the two cortices may process different but  
724 complementary information. This hypothesis is also unlikely; we found no large signals that  
725 were present in the driving cortex but absent in the non-driving cortex.

726 It is also possible that activity ipsilateral to the moving arm may relate to uncrossed descending  
727 connections (Kuypers, 1981; Rosenzweig et al., 2009). For example, activity in the right motor  
728 cortex could exist to drive, via uncrossed connections, muscle activity in the right arm when that  
729 arm performs the task. Our results are in principle consistent with this hypothesis. However,  
730 prior studies have found little evidence for a robust relationship between M1 and ipsilateral  
731 muscle activations. Intracortical microstimulation readily produces contralateral muscle  
732 responses (Kwan et al., 1978; Sessle and Wiesendanger, 1982), yet very rarely generates  
733 ipsilateral muscle responses (Aizawa et al., 1990). Intracellular recordings of motoneurons reveal  
734 no monosynaptic evoked potentials from ipsilateral corticospinal tract stimulation and spike-  
735 triggered EMG effects are present only for contralateral muscles (Soteropoulos et al., 2011). For  
736 these reasons, we suspect that uncrossed projections are unlikely to be the primary reason that  
737 the non-driving motor cortex is active.

738 Another possibility is that activity in the non-driving cortex is produced by an efference copy of  
739 signals generated and employed by the driving cortex, which are conveyed to allow coordination  
740 between the limbs. Many – perhaps most – movements require coordination across the midline.  
741 Given the near-ubiquitous need for coordination, it may be that efference copy signals are simply  
742 conveyed by default, and ignored if they are not needed. Our results are consistent with this  
743 possibility, and argue that if it is correct, then the relevant efference copy must be quite  
744 complete. That is, the driving cortex must convey the majority of the signals it generates, rather  
745 than (for example) just the output signals.

746 A final, and intriguing possibility, is that motor cortical computations are largely distributed  
747 across both hemispheres (Li et al., 2016). In the extreme, neurons in the non-driving cortex  
748 might simply be viewed the way we view most neurons in the driving cortex; they can contribute

749 to the computation even if they are one or more synapses from the cortico-spinal neurons that  
750 will convey the output. This hypothesis is appealing because it could explain the finding that all  
751 major signals appear to be shared between hemispheres. More generally, if a randomly chosen  
752 neuron from the non-driving cortex has responses that are nearly indistinguishable from a neuron  
753 chosen from the driving cortex, perhaps our default assumption should be that they are  
754 participating in the same computation. While appealing, it is unclear if this hypothesis can be  
755 reconciled with the finding that motor cortex inactivation principally affects the contralateral  
756 limbs (Glees and Cole, 1950; Liu and Rouiller, 1999; Passingham et al., 1983). If both  
757 hemispheres participate in controlling both arms, one would expect a more bilateral deficit. A  
758 possible, but highly speculative, resolution is that the network is sufficiently robust that it can  
759 still function when many neurons are inactivated, so long as the output neurons can still convey  
760 the necessary commands.

#### 761 *Ipsilateral arm signals in other brain regions*

762 Cortical areas, subcortical areas, and the spinal cord all contribute to the control of dexterous  
763 movements. Indeed, other studies comparing contralateral and ipsilateral movements have found  
764 that not only M1, but also the dorsal premotor cortex (Cisek et al., 2003; Kermadi et al., 2000;  
765 Tanji et al., 1988), ventral premotor cortex (Michaels and Scherberger, 2018), Supplemental  
766 Motor Area (Donchin et al., 2002; Gribova et al., 2002; Kazennikov et al., 1999; Kermadi et al.,  
767 2000, 1998; Tanji et al., 1988), Cingulate Motor Area (Kermadi et al., 2000), and the Posterior  
768 Parietal Cortex (Kermadi et al., 2000) all contain neurons which respond to movements of the  
769 ipsilateral arm. Furthermore, there are circuits in the brainstem and spinal cord which  
770 specifically support the generation of coordinated, rhythmic movements like locomotion  
771 (Duysens and de Crommert, 1998). Other brain regions, such as the Anterior Intraparietal Area,  
772 encode movement parameters in a largely effector-independent manner (Michaels and  
773 Scherberger, 2018), suggesting that the relationship of motor and visuo-motor areas to ipsilateral  
774 movements may vary depending on their role in motor computation. In general, movement  
775 generation is the result of the action of a broad, interconnected network of brain and spinal  
776 regions. We focused on M1 because it is the cortical region that, based on anatomy and  
777 microstimulation results, seemed most likely to have a lateralized representation of movement.  
778 Yet even in M1 we failed to find evidence of strongly lateralized activity.

779 *Summary*

780 Neural signals related to movements of either arm were mixed, both within hemispheres and  
781 within single neurons. However, signals related to the two arms were naturally partitioned into  
782 different neural dimensions. This underscores the computational usefulness of leveraging  
783 different dimensions for different computations; signals can be shared across a wide population  
784 yet still be readily separated by downstream regions. Our results argue that motor cortex shares  
785 highly detailed information cross-cortically, suggesting that control may span both hemispheres  
786 even if output commands originate primarily from the contralateral hemisphere.

## Acknowledgements

787 We thank Y. Pavlova for expert animal care. A. Russo provided code to calculate trajectory  
788 tangling. This work was supported by NINDS 1DP2NS083037, NIH CRCNS R01NS100066,  
789 NINDS 1U19NS104649, the Simons Foundation (SCGB#325233 and SCGB#542957), the  
790 Grossman Center for the Statistics of Mind, the McKnight Foundation, P30 EY019007,  
791 a Klingenstein-Simons Fellowship, the Searle Scholars Program. KCA was funded by a Simon's  
792 Foundation Collaboration on the Global Brain Post-doctoral Fellowship.



## References

- Aizawa H, Mushiake H, Inase M, Tanji J. 1990. An output zone of the monkey primary motor cortex specialized for bilateral hand movement. *Experimental Brain Research* **82**:219–221.
- Churchland MM, Cunningham JP, Kaufman MT, Foster JD, Nuyujukian P, Ryu SI, Shenoy KV. 2012. Neural population dynamics during reaching. *Nature* **487**:51–56. doi:10.1038/nature11129
- Cisek P, Crammond DJ, Kalaska JF. 2003. Neural activity in primary motor and dorsal premotor cortex in reaching tasks with the contralateral versus ipsilateral arm. *Journal of neurophysiology* **89**:922–942.
- Donchin O, Gribova A, Steinberg O, Bergman H, Vaadia E. 1998. Primary motor cortex is involved in bimanual coordination. *Nature* **395**:26220. doi:10.1038/26220
- Donchin O, Gribova A, Steinberg O, Mitz A, Bergman H, Vaadia E. 2002. Single-Unit Activity Related to Bimanual Arm Movements in the Primary and Supplementary Motor Cortices. *J Neurophysiol* **88**:3498–3517. doi:10.1152/jn.00335.2001
- Druckmann S, Chklovskii DB. 2012. Neuronal Circuits Underlying Persistent Representations Despite Time Varying Activity. *Curr Biology Cb* **22**:2095–103. doi:10.1016/j.cub.2012.08.058
- Duysens J, de Crommert H. 1998. Neural control of locomotion; Part 1: The central pattern generator from cats to humans. *Gait Posture* **7**:131–141. doi:10.1016/s0966-6362(97)00042-8
- Elsayed G, Lara A, Kaufman M. 2016. Reorganization between preparatory and movement population responses in motor cortex.
- Ferbert A, Priori A, Rothwell J, Day B, Colebatch J, Marsden C. 1992. Interhemispheric inhibition of the human motor cortex. *J Physiology* **453**:525–546. doi:10.1113/jphysiol.1992.sp019243
- Glees P, Cole J. 1950. Recovery of skilled motor functions after small repeated lesions of motor cortex in macaque. *J Neurophysiol* **13**:137–148. doi:10.1152/jn.1950.13.2.137
- Gould H, Cusick C, Pons T, Kaas J. 1986. The relationship of corpus callosum connections to electrical stimulation maps of motor, supplementary motor, and the frontal eye fields in owl monkeys. *J Comp Neurol* **247**:297–325. doi:10.1002/cne.902470303
- Gribova A, Donchin O, Bergman H, Vaadia E, de Oliveira CS. 2002. Timing of bimanual movements in human and non-human primates in relation to neuronal activity in primary motor cortex and supplementary motor area. *Exp Brain Res* **146**:322–335. doi:10.1007/s00221-002-1174-x
- Hanajima R, Ugawa Y, Machii K, Mochizuki H, Terao Y, Enomoto H, Furubayashi T, Shiio Y, Uesugi H, Kanazawa I. 2001. Interhemispheric facilitation of the hand motor area in humans. *J Physiology* **531**:849–859. doi:10.1111/j.1469-7793.2001.0849h.x

- Jenny A. 1979. Commissural projections of the cortical hand motor area in monkeys. *J Comp Neurol* **188**:137–145. doi:10.1002/cne.901880111
- Jones E, Wise S. 1977. Size, laminar and columnar distribution of efferent cells in the sensory-motor cortex of monkeys. *J Comp Neurol* **175**:391–437. doi:10.1002/cne.901750403
- Kaufman MT, Churchland MM, Ryu SI, Shenoy KV. 2014. Cortical activity in the null space: permitting preparation without movement. *Nature neuroscience* **17**:440–448. doi:10.1038/nn.3643
- Kaufman MT, Seely JS, Sussillo D, Ryu SI, Shenoy KV, Churchland MM. 2016. The Largest Response Component in the Motor Cortex Reflects Movement Timing but Not Movement Type. *eneuro* **3**:ENEURO.0085-16.2016. doi:10.1523/ENEURO.0085-16.2016
- Kazennikov O, Hyland B, Corboz M, Babalian A, Rouiller E., Wiesendanger M. 1999. Neural activity of supplementary and primary motor areas in monkeys and its relation to bimanual and unimanual movement sequences. *Neuroscience* **89**:661–674. doi:10.1016/s0306-4522(98)00348-0
- Kermadi I, Liu Y, Rouiller EM. 2000. Do bimanual motor actions involve the dorsal premotor (PMd), cingulate (CMA) and posterior parietal (PPC) cortices? Comparison with primary and supplementary motor cortical areas. *Somatosens Mot Res* **17**:255–271. doi:10.1080/08990220050117619
- Kermadi I, Liu Y, Tempini A, Calciati E, Rouiller EM. 1998. Neuronal activity in the primate supplementary motor area and the primary motor cortex in relation to spatio-temporal bimanual coordination. *Somatosens Mot Res* **15**:287–308. doi:10.1080/089902298707079
- Kwan H, MacKay W, Murphy J, Wong Y. 1978. Spatial organization of precentral cortex in awake primates. II. Motor outputs. *J Neurophysiol* **41**:1120–1131. doi:10.1152/jn.1978.41.5.1120
- Li N, Daie K, Svoboda K, Druckmann S. 2016. Robust neuronal dynamics in premotor cortex during motor planning. *Nature* **532**:459–464. doi:10.1038/nature17643
- Liu Y, Rouiller E. 1999. Mechanisms of recovery of dexterity following unilateral lesion of the sensorimotor cortex in adult monkeys. *Exp Brain Res* **128**:149–159. doi:10.1007/s002210050830
- Machens C, Romo R, Brody C. 2010. Functional, But Not Anatomical, Separation of “What” and “When” in Prefrontal Cortex. *Journal of Neuroscience* **30**:350–360. doi:10.1523/JNEUROSCI.3276-09.2010
- Mante V, Sussillo D, Shenoy KV, Newsome WT. 2013. Context-dependent computation by recurrent dynamics in prefrontal cortex. *Nature* **503**:78–84. doi:10.1038/nature12742

Meyer -U B, Rörich S, von Einsiedel GH, Kruggel F, Weindl A. 1995. Inhibitory and excitatory interhemispheric transfers between motor cortical areas in normal humans and patients with abnormalities of the corpus callosum. *Brain* **118**:429–440. doi:10.1093/brain/118.2.429

Michaels JA, Scherberger H. 2018. Population coding of grasp and laterality-related information in the macaque fronto-parietal network. *Sci Rep-uk* **8**:1710. doi:10.1038/s41598-018-20051-7

Murata Y, Higo N, Oishi T, Yamashita A, Matsuda K, Hayashi M, Yamane S. 2008. Effects of Motor Training on the Recovery of Manual Dexterity After Primary Motor Cortex Lesion in Macaque Monkeys. *J Neurophysiol* **99**:773–786. doi:10.1152/jn.01001.2007

Passingham RE, Perry V, Wilkinson F. 1983. The Long-term Effects of Removal of Sensorimotor Cortex in Infant and Adult Rhesus Monkeys. *Brain* **106**:675–705. doi:10.1093/brain/106.3.675

Raposo D, Kaufman MT, Churchland AK. 2014. A category-free neural population supports evolving demands during decision-making. *Nature neuroscience* **17**:1784–1792. doi:10.1038/nn.3865

Rouiller EM, Babalian A, Kazennikov O, Moret V, Yu -H. X, Wiesendanger M. 1994. Transcallosal connections of the distal forelimb representations of the primary and supplementary motor cortical areas in macaque monkeys. *Exp Brain Res* **102**:227–243. doi:10.1007/bf00227511

Russo AA, Bittner SR, Perkins SM, Seely JS, London BM, Lara AH, Miri A, Marshall NJ, Kohn A, Jessell TM, Abbott LF, Cunningham JP, Churchland MM. 2018. Motor Cortex Embeds Muscle-like Commands in an Untangled Population Response. *Neuron*. doi:10.1016/j.neuron.2018.01.004

Sessle B, Wiesendanger M. 1982. Structural and functional definition of the motor cortex in the monkey (*Macaca fascicularis*). *J Physiology* **323**:245–265. doi:10.1113/jphysiol.1982.sp014071

Steinberg O, Donchin O, Gribova A, Oliveira CS, Bergman H, Vaadia E. 2002. Neuronal populations in primary motor cortex encode bimanual arm movements. *Eur J Neurosci* **15**:1371–1380. doi:10.1046/j.1460-9568.2002.01968.x

Tanji J, Okano K, Sato K. 1988. Neuronal activity in cortical motor areas related to ipsilateral, contralateral, and bilateral digit movements of the monkey. *Journal of neurophysiology* **60**:325–43.

Vilensky JA, Gilman S. 2002. Lesions of the Precentral Gyrus in Nonhuman Primates: A Pre-Medline Bibliography. *Int J Primatol* **23**:1319–1333. doi:10.1023/a:1021135122571

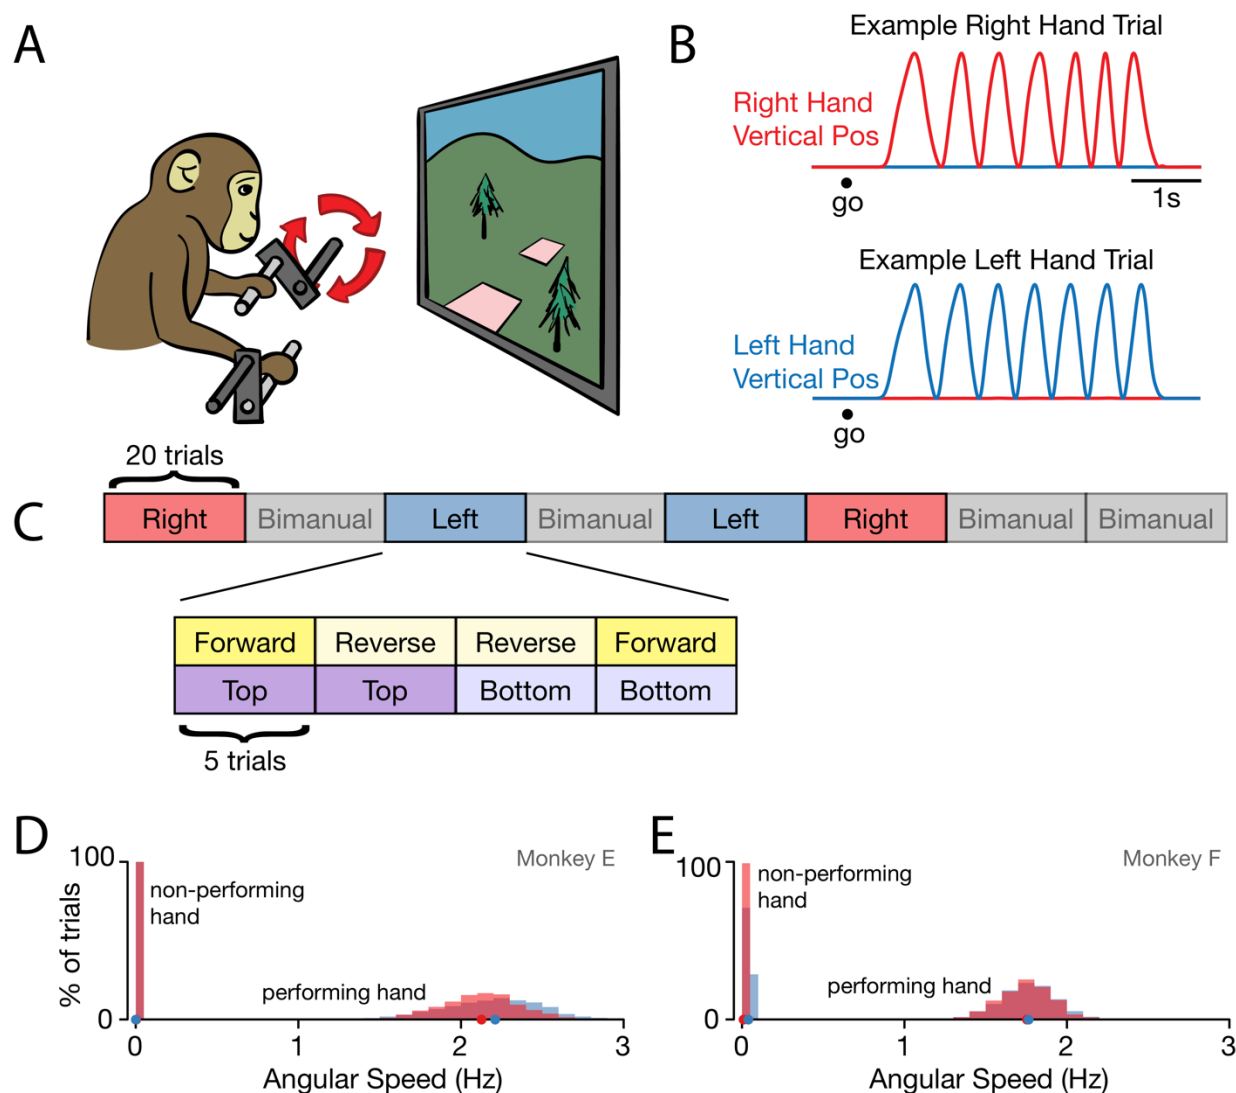

793 **Figure 1:** Behavior. (A) Task schematic. Cycling one of the two pedals produced progress  
 794 through a virtual environment. The other pedal had to remain stationary. This schematic  
 795 simplifies the physical setup. In particular, pedals employed a handle that ensured consistent  
 796 hand posture and a brace that minimized wrist movement. (B) Behavior on two example trials.  
 797 After a go cue, the monkey cycled for seven cycles with one hand while holding the other hand  
 798 stationary. *Red trace*: Right hand vertical position. *Blue trace*: Left hand vertical position. (C)  
 799 Task structure. Blocks of right hand, left hand, and bimanual conditions were presented in  
 800 pseudorandom order. Within each block of 20 trials, trials were presented in sub-blocks of 5  
 801 trials for each combination of cycling direction and starting position. (D) Distributions of cycling  
 802 speed for the performing and non-performing hands. The average angular speed was computed  
 803 for each trial. Distributions are across trials. *Red*: Right hand. *Blue*: Left hand. Dots show  
 804 distribution medians. Data are for Monkey E. (E) Same as D but for Monkey F.

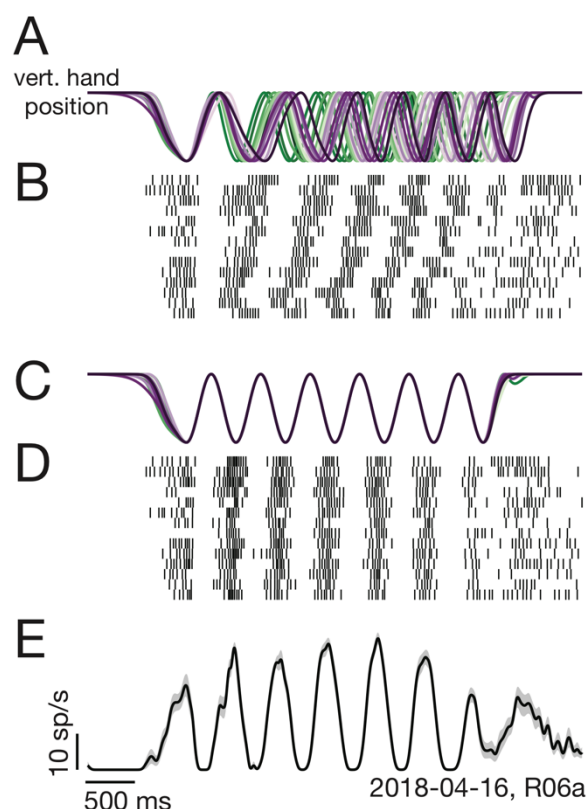

805 **Figure 2:** Two-step trial alignment procedure. (A) Vertical hand position on all trials (within one  
806 session) for an example condition. Data are aligned to the first half-cycle of movement. Trials  
807 are colored *green* to *purple* based on the average cycling speed for that trial. (B) Raster plot of  
808 spike times for an example neuron, for the same trials as in A. Trials are ordered by average  
809 cycling speed and aligned as in A. (C) Hand position traces after the second alignment step:  
810 adjusting the time-base of each trial so that cycling during the middle 6 cycles matched the  
811 typical 2-hz pedaling speed. (E) Spike times, as in B, after the second alignment step. (F)  
812 Average firing rate calculated after the second alignment step. *Black*: Mean firing rate. Gray  
813 shading: standard error across trials.

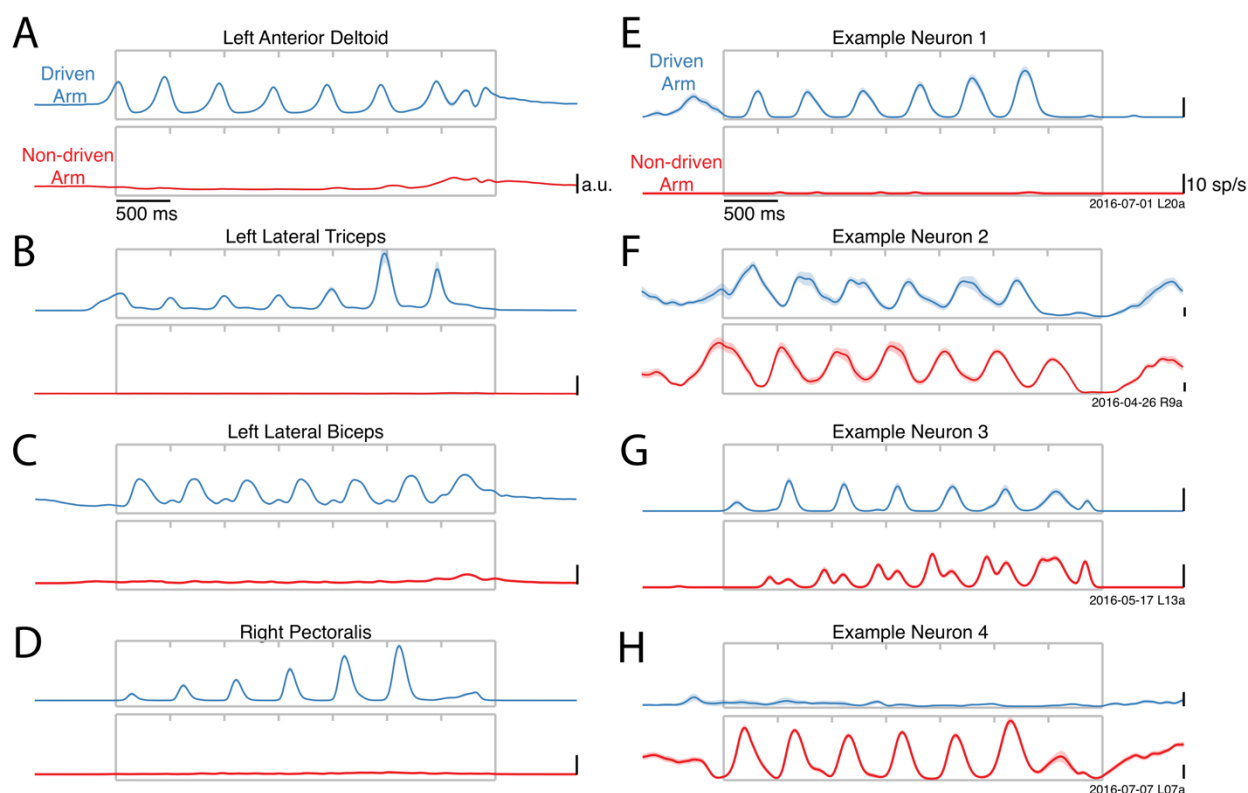

814 **Figure 3:** Activity versus time for four example muscles (A-D) and four example neurons (E-H).  
815 Each panel shows activity for one condition performed with either the driven arm (*blue*) or the  
816 non-driven arm (*red*). Each trace plots trial-averaged activity, with flanking envelopes  
817 (sometimes barely visible) showing standard errors. Gray boxes indicate when the pedal was  
818 moving, with tick marks dividing each cycle. All data are from Monkey E.

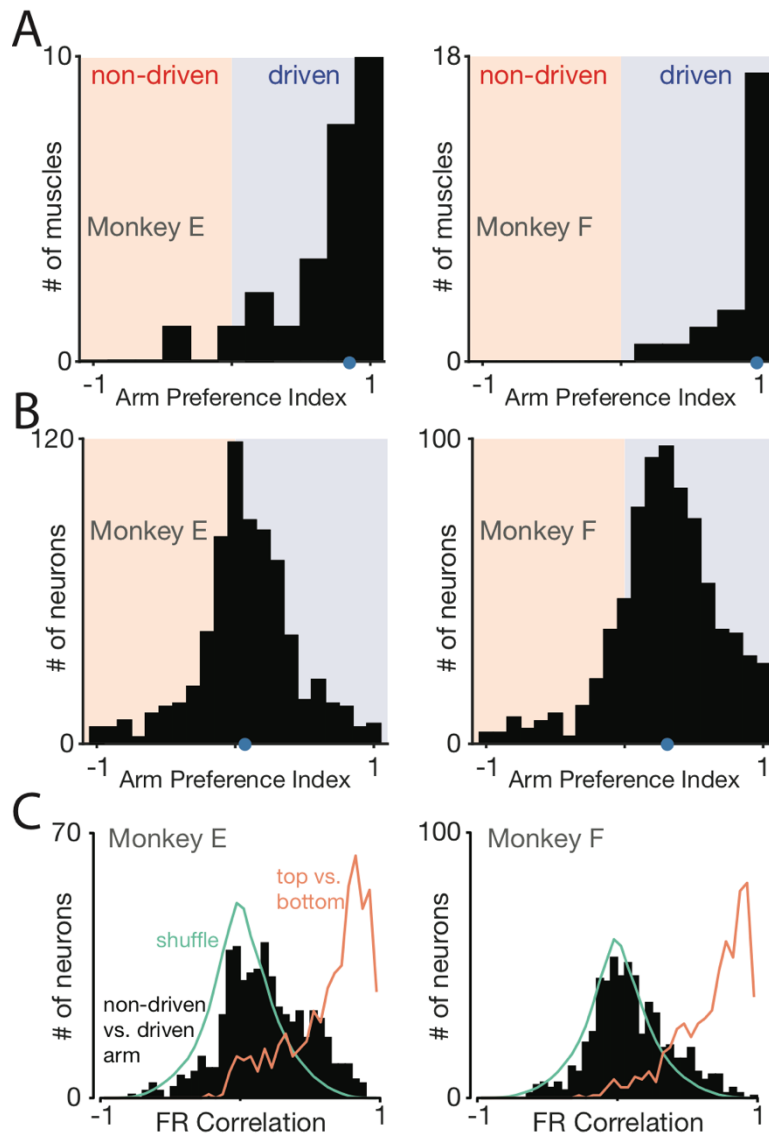

819 **Figure 4:** Muscle responses are lateralized while neural responses are not. (A) Histograms of  
820 arm preference index for all recorded muscles. Shaded regions indicate preference for the non-  
821 driven arm (red) and driven arm (blue). Blue dot indicates median arm preference. (B)  
822 Histograms of arm preference index for all recorded neurons. (C) Histograms summarizing, for  
823 single neurons, similarity of responses when the task is performed with the driven versus non-  
824 driven arm. For each neuron, we computed the correlation between those two responses. Black  
825 histograms plot the distribution of such correlations across all neurons. Green trace: expected  
826 distribution if there is no relationship between responses corresponding to the two arms. This  
827 was computed via a shuffle procedure. Orange trace: control demonstrating that high  
828 correlations are observed, as expected, when comparing responses during top-start versus  
829 bottom-start conditions.

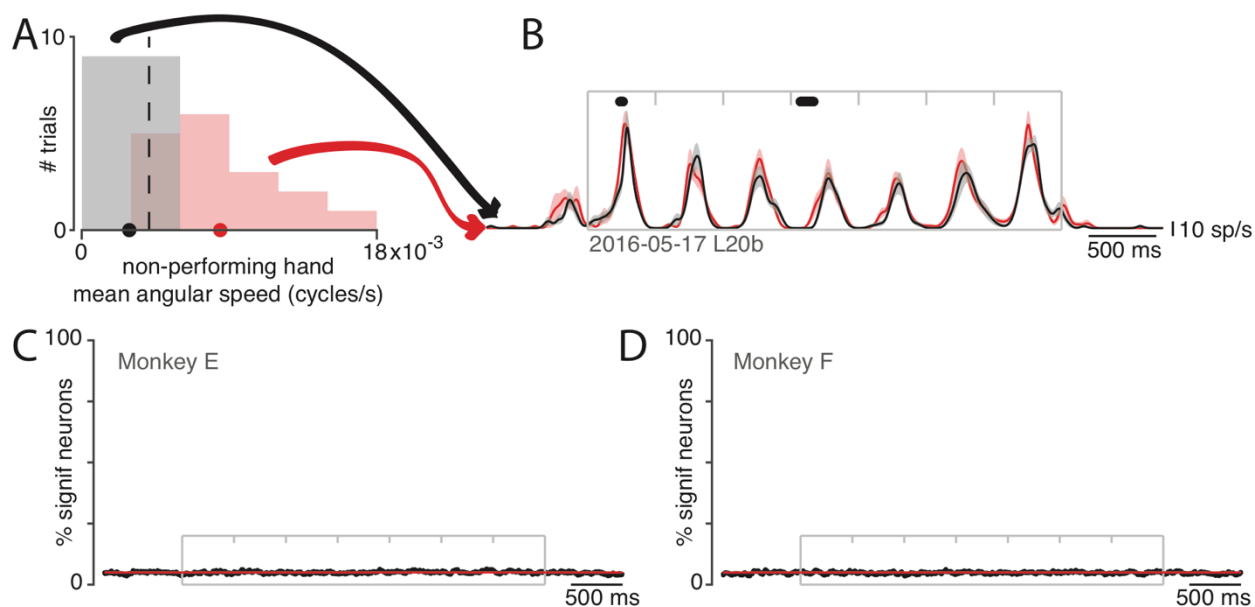

830 **Figure 5:** Small movements of the non-performing arm cannot explain modulation of neural  
831 activity within the non-driving cortex. (A) Analysis employed the distribution (across trials) of  
832 the mean angular speed of the non-performing arm. This distribution is shown for one condition,  
833 recorded on one day. Trials were divided into those with mean speed less than (*gray*) or greater  
834 than (*red*) the median (*vertical dashed line*). (B) Firing rate of one example neuron for these two  
835 groups: trials with speeds less than (*black*) and greater than (*red*) the median. Envelopes show  
836 standard errors of the mean. *Black dots* at top indicate times when the two rates were  
837 significantly different ( $p < 0.05$ ). Plotting conventions as in Fig. 3. (C) Percentage of neurons  
838 (*black trace*) showing a statistically significant difference ( $p < 0.05$ ) in firing rate for trials with  
839 speeds less than versus greater than the median. Differences occurred roughly as often as  
840 expected by chance (*red line* at 5%). *Gray box* denotes the time of movement. Each tick mark  
841 delineates a cycle. Data are for monkey E. Analysis is based on 426 neurons. (D) As in C but for  
842 Monkey F. Analysis is based on 479 neurons.



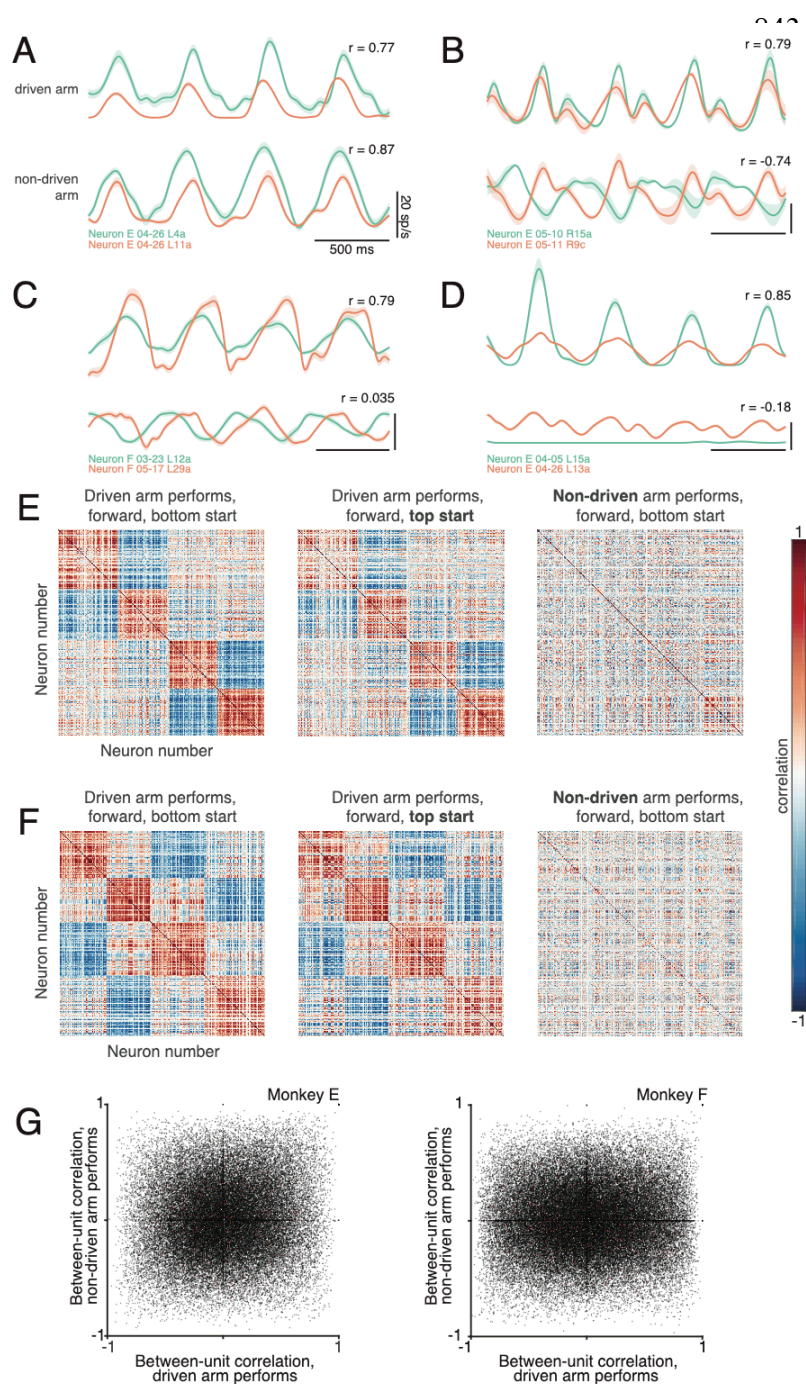

**Figure 6:** Correlations between neurons depend on which arm is used. (A) Average firing rates of two neurons (*green* and *orange* traces) during one condition, performed with the driven arm (top pair of traces) and non-driven arm (bottom pair of traces). Responses are shown for the middle cycles, which form the basis of the analysis below. For this example, the firing rates of the two neurons were strongly correlated when the driven arm performed the task, and remained so when the non-driven arm performed the task. Flanking envelopes show standard errors of the mean. (B-D) Responses of three other pairs of neurons. All pairs exhibit correlated responses when the task was performed with the driven arm. Correlations disappear or even invert when the task is performed with the non-driven arm. (E) Pairwise correlations between all neurons recorded from the left hemisphere of monkey E. Each panel plots the correlation matrix for one condition, indicated at top. Neuron ordering was based on data in the left column, and is preserved across columns. (F) same but for Monkey F. (G)

881 Scatterplots of pairwise correlations. Each dot corresponds to a pair of units for a given  
 882 condition, and plots the firing rate correlation when using the non-driven arm versus that when  
 883 using the driven arm. To aid visualization, a randomly-selected 10% of data points are shown for  
 884 this subplot.

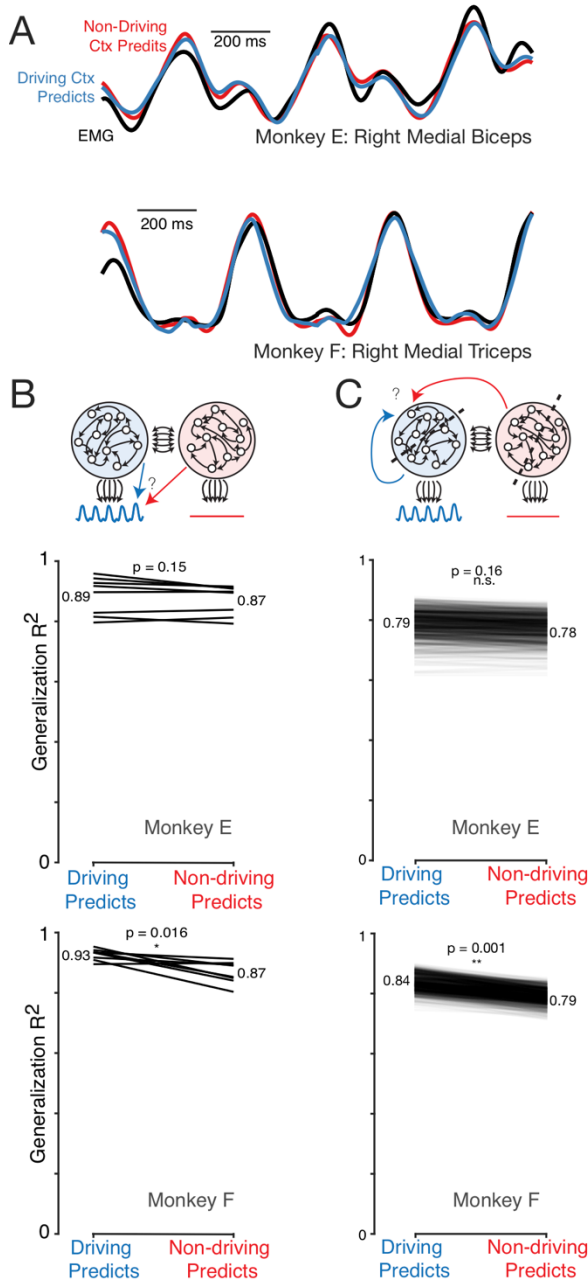

**Figure 7:** Population activity in the driving and non-driving hemispheres carries similar signals. (A) Muscle activity (*black*) and predictions of muscle activity based on a linear decode of neural activity in the driving (*blue*) and non-driving (*red*) cortex. Examples are shown for two muscles from the two monkeys. In both cases, data is from a test condition and illustrates generalization performance. (B) Quantitative comparison of performance when predicting muscle activity from neural activity in the driving versus non-driving hemisphere. *Top:* Cartoon illustration of the analysis approach. Performing-arm muscle activity (*blue trace*) is a product of descending connections (*black arrows*) from neurons within the driving cortex (*blue circle*). It should thus be possible to predict (*blue arrow*) that muscle activity from neural activity recorded from the driving cortex. The presence or absence of muscle-like signals within the non-driving cortex (red circle) was assessed by asking how well such activity predicted (*red arrow*) performing-arm muscle activity. *Bottom two panels:* prediction performance for the above comparisons, for both monkeys. Each line corresponds to one behavioral condition, and shows the percent variance (of muscle population activity) predicted by the driving and non-driving cortices. (C) Analysis asking whether the signals carried by the driving cortex are also present in the non-driving cortex. *Top:* Cartoon illustration of the analysis approach.

When the task is performed with a given arm,

920 neural activity within the corresponding driving cortex is predicted either from the activity of  
 921 other neurons either within the driving cortex (blue arrow) or within the non-driving cortex (red  
 922 arrow). *Bottom two panels:* Prediction performance for those two comparisons, for both  
 923 monkeys. Each line shows the performance for one random split of the data. After each random  
 924 split, the activity of half the neurons in the driving cortex was predicted either based on the other  
 925 half, or based on a matched number of neurons from the non-driving cortex.

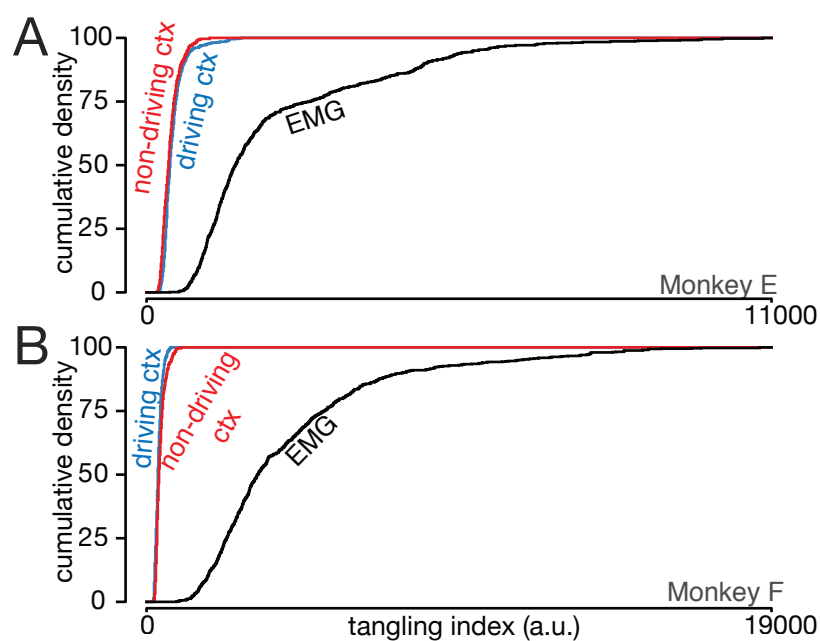

926 **Figure 8:** Trajectory tangling is similar for the driving and non-driving cortices. (A) Cumulative  
927 distribution of trajectory tangling for the driving cortex (*blue*), non-driving cortex (*red*), and  
928 muscle activity (*black*). Distributions were calculated across all time points and conditions. Data  
929 for monkey E. (B) As in A, for Monkey F.

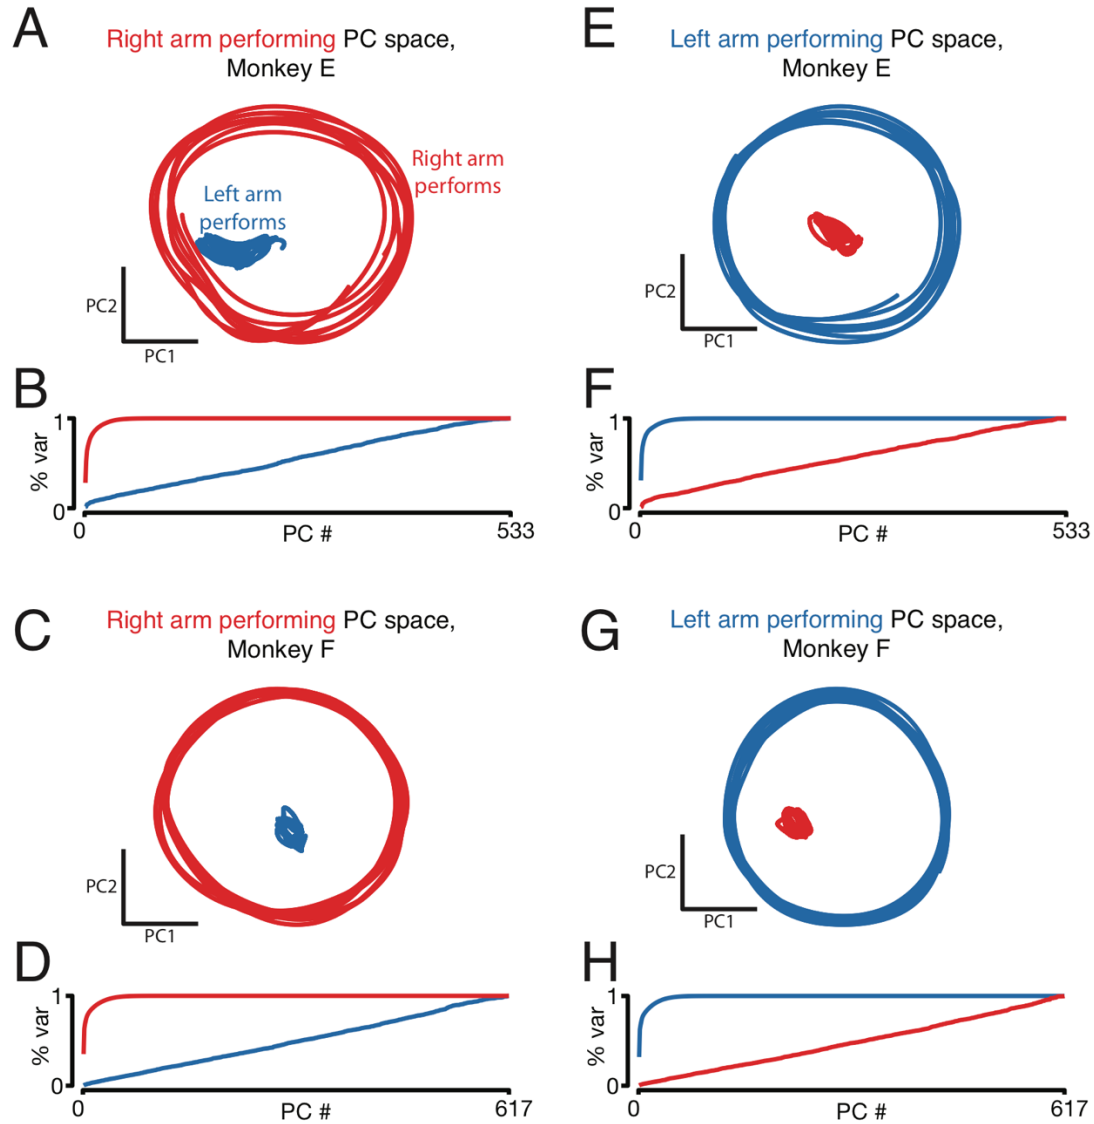

930 **Figure 9:** Right-arm-related and left-arm-related population activity lie in orthogonal subspaces.  
931 (A) Projection of population activity for right-arm-performing (*red*) and left-arm-performing  
932 (*blue*) conditions, with PCs found using only right-arm-performing data. The neural population  
933 includes all recorded neurons across both hemispheres. Analysis considers data from the middle  
934 cycles when cycling forward, for both top-start and bottom-start conditions. Data are for monkey  
935 E. (B) Cumulative variance explained for right-arm-performing (*red*) and left-arm-performing  
936 (*blue*) conditions, using PCs found from right-arm-performing data only. (C,D) As above but for  
937 Monkey F. (E-H) As in A-D, but with PCs found using only left-arm-performing data. All data  
938 shown are for analyses performed on forward cycling conditions.

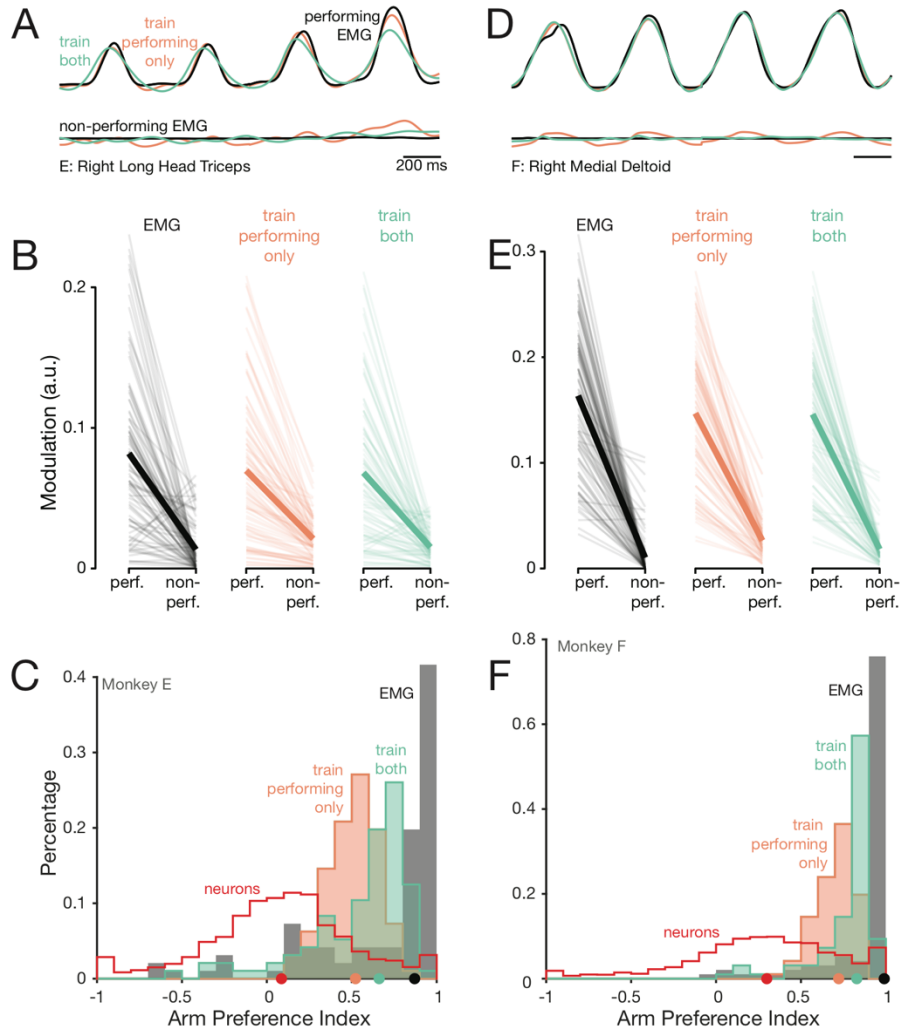

939 **Figure 10:** When decoding muscle activity in a given arm, decoders naturally ignore activity  
 940 related to the other arm. (A) Activity of the long head of the *triceps*, recorded from the right arm  
 941 of monkey E. *Black trace:* Recorded EMG activity. *Orange trace:* Prediction of a decoder  
 942 trained only on right-arm-performing conditions. *Green trace:* Prediction of a decoder trained on  
 943 a subset of both left- and right-arm-performing conditions. Top traces: while the right arm  
 944 performed the task. Bottom traces: while the other arm performed the task. Data are for a left-out  
 945 condition, to which decoders had to generalize. (B) For Monkey E, EMG modulation while  
 946 performing the task versus while the other arm performs the task. *Thin lines:* individual muscles  
 947 and conditions. *Thick lines:* median modulation. *Black:* Recorded EMG activity. *Orange:*  
 948 Predictions of a decoder trained only on performing conditions. *Green:* Predictions of a decoder  
 949 trained on both performing and non-performing conditions. (C) For Monkey E, distribution of  
 950 arm preference indices for neurons (*red*), muscles (*gray*), predictions of a decoder trained only  
 951 on performing-arm conditions (*orange*), predictions of a decoder trained on both performing and  
 952 non-performing arm conditions (*green*). *Red histograms* and *gray histograms* differ slightly from  
 953 those in Fig. 4A-B as they are computed per condition, given that the present analysis focuses on  
 954 generalization performance for left-out conditions. (D-E) As in A-C, for Monkey F. All data  
 955 shown is from generalization to held-out conditions.
